# Supplementary material for: Mapping genome variation of SARS-CoV-2 worldwide highlights the impact of COVID-19 super-spreaders
Source: HighWire-hosted journal article supplement (doi:10.1101/gr.266221.120), 2020-09-02
Supplement: Supplemental_Table_S1.xlsx [file Supplemental_Table_S1.xlsx]

## Sheet: Table S1
Table S1. Number of mutational changes occurring along the branches of the most parsimonious phylogeny of SARS-CoV-2 and the number of occurrences at the tip ends of the phylogeny (private).
Position	Variant (format 1)	Variant (format 2)	Nº of private occurrences	HG - private variants	Nº of occurrences along branches	HG - tree variants	Total occurrences
186	186C>T	C186T	3	A;A1a3a;A2a2a	0	-	3
186	186C>A	C186A	1	A1a3	0	-	1
187	187A>G	A187G	0	-	1	A2a8	1
198	198G>A	G198A	1	A4	0	-	1
199	199G>T	G199T	3	A2a2a;A2a2a4a;A2a4	0	-	3
203	203C>T	C203T	3	A1;A2a4;A6	0	-	3
204	204G>T	G204T	1	A2a2a	0	-	1
207	207C>T	C207T	3	A1a3;A3a1a;B6	0	-	3
210	210G>T	G210T	3	A1a3a;A2a2c;A4b	0	-	3
211	211T>C	T211C	1	A1a3	0	-	1
218	218C>T	C218T	4	A2a1;A2a2a2;A2a4;A11	0	-	4
228	228C>T	C228T	2	A3a1a3;B1a1f	0	-	2
241	241C>T	C241T	3	A;A1a3a;B1a1h	1	A2	4
248	248G>T	G248T	1	A2a3	0	-	1
254	254C>T	C254T	2	A;A3	0	-	2
261	261G>T	G261T	2	A2a;B1a1c	0	-	2
263	263A>G	A263G	2	A2a;A3a1a3	0	-	2
274	274C>T	C274T	2	A;A2a2a	0	-	2
274	274C>A	C274A	1	A2a11	0	-	1
281	281C>T	C281T	2	A2a2a2;B1a1i1	0	-	2
284	284G>T	G284T	1	A1a3a	0	-	1
285	285G>C	G285C	1	A2a2a2	0	-	1
285	285G>T	G285T	1	B2	0	-	1
289	289C>T	C289T	2	A2a14a;B	0	-	2
313	313C>T	C313T	1	A2a3g	1	A2a4d	2
335	335C>T	C335T	3	A2a1;A2a2c;A3	0	-	3
337	337C>T	C337T	1	A2a2	0	-	1
354	354G>A	G354A	1	B1a1	0	-	1
361	361A>G	A361G	1	B4a	0	-	1
374	374G>A	G374A	4	A2a3;A3a1;A3a1a5;B1a1	0	-	4
379	379C>A	C379A	0	-	1	A2a2a14	1
388	388G>T	G388T	2	A1a;A1a3a	0	-	2
398	398C>T	C398T	2	A1b;A5	0	-	2
431	431G>A	G431A	1	A	0	-	1
460	460A>G	A460G	1	B1a1	0	-	1
490	490T>A	T490A	0	-	1	B5a	1
514	514T>C	T514C	2	A;A2a	0	-	2
526	526G>T	G526T	2	A2a4;A4	0	-	2
527	527C>T	C527T	2	A1a3a3;A2a7	0	-	2
541	541C>T	C541T	5	A2a1;A2a2a;A2a3;A2a4;A2a12a	0	-	5
556	556C>T	C556T	1	B1a1i1	0	-	1
558	558G>T	G558T	1	B4b	0	-	1
560	560C>T	C560T	1	A2a3	0	-	1
563	563A>T	A563T	1	A2a4	0	-	1
575	575C>T	C575T	15	A1;A1a2d;A1a3a2;A2a;A2a2;A2a2a;A2a2b1;A2a3;A2a4b1;A2a8;A2a15;A2a15a;A3c;A4a1;B1a1d	0	-	15
583	583C>T	C583T	1	A	0	-	1
586	586T>C	T586C	1	A1a4	0	-	1
598	598G>T	G598T	1	A2a2a4a	0	-	1
613	613G>A	G613A	1	A2a	0	-	1
614	614G>A	G614A	1	A9a	0	-	1
618	618A>G	A618G	0	-	1	A2a3d	1
619	619C>T	C619T	2	A1a3a3;A2a2a	0	-	2
658	658T>C	T658C	0	-	1	A2a12a	1
673	673C>T	C673T	2	A2a2a;A2a2a9	0	-	2
679	679C>T	C679T	4	A2a2a13a;A2a3;A2a3d;A2a4	0	-	4
680	680G>A	G680A	1	A2a4c1	0	-	1
683	683C>T	C683T	3	A2a2a9;B1a1;B5a1a	0	-	3
709	709G>A	G709A	1	A	0	-	1
745	745C>T	C745T	1	A	0	-	1
761	761A>G	A761G	1	A2a2a	0	-	1
799	799C>T	C799T	2	A2a5;A2a5b	0	-	2
832	832C>T	C832T	0	-	1	B1a1j	1
833	833T>C	T833C	1	A2a2a9	0	-	1
842	842C>T	C842T	1	A2a4a	0	-	1
845	845G>T	G845T	3	A;A2a4d;A9b	0	-	3
848	848G>T	G848T	1	A2a4c1	0	-	1
865	865C>T	C865T	1	B1	0	-	1
871	871A>G	A871G	1	A3	0	-	1
884	884C>T	C884T	3	A2a1;A2a2c;A3a1	1	A3a1a1	4
913	913C>T	C913T	1	A2a4	0	-	1
914	914G>A	G914A	1	A2a2a	0	-	1
915	915A>G	A915G	1	A1a	0	-	1
932	932G>A	G932A	1	A2a2b	0	-	1
936	936C>T	C936T	2	A2a2a2;B1a1f	0	-	2
946	946T>C	T946C	1	B6	0	-	1
957	957G>A	G957A	1	B1a1	0	-	1
959	959C>T	C959T	1	A2a4h	0	-	1
973	973T>C	T973C	1	A3	0	-	1
998	998T>G	T998G	1	B5a1a	0	-	1
1015	1015A>G	A1015G	1	A2a4	0	-	1
1059	1059C>T	C1059T	2	A;A2a	2	A2a2a;A3a1a4	4
1076	1076C>T	C1076T	1	A3a	1	A3a1a2	2
1079	1079A>C	A1079C	2	A3a1;A3a1a	0	-	2
1102	1102C>T	C1102T	1	B1a1	0	-	1
1115	1115A>G	A1115G	1	A3b	0	-	1
1140	1140A>C	A1140C	1	A2a5	0	-	1
1149	1149G>T	G1149T	1	A1a	0	-	1
1186	1186G>C	G1186C	1	A4a	0	-	1
1188	1188C>T	C1188T	1	A1a2	0	-	1
1190	1190C>T	C1190T	2	A2a4i;A3	0	-	2
1191	1191C>T	C1191T	2	A2a;A2a2a9	0	-	2
1213	1213C>T	C1213T	1	A1a2a1	0	-	1
1218	1218C>T	C1218T	3	A2a1;A2a4;A11	0	-	3
1238	1238C>T	C1238T	1	B1a1	0	-	1
1265	1265G>A	G1265A	1	B	0	-	1
1270	1270T>C	T1270C	1	A2a3	0	-	1
1302	1302C>T	C1302T	2	A2a2a;A2a2a2	0	-	2
1308	1308A>G	A1308G	1	A2a2a14	0	-	1
1321	1321A>C	A1321C	1	A1a2	0	-	1
1326	1326C>T	C1326T	1	B1a1	0	-	1
1331	1331A>G	A1331G	1	A2a5a	0	-	1
1342	1342C>T	C1342T	1	B1	0	-	1
1350	1350A>T	A1350T	1	A1a3a	0	-	1
1368	1368T>C	T1368C	1	A1a5	0	-	1
1376	1376C>G	C1376G	1	A2a	0	-	1
1385	1385C>T	C1385T	2	A;A2a2a	0	-	2
1397	1397G>A	G1397A	1	A	1	A3a	2
1404	1404C>T	C1404T	1	A1	0	-	1
1405	1405T>C	T1405C	1	A	0	-	1
1427	1427C>T	C1427T	1	A2a4	0	-	1
1430	1430A>G	A1430G	2	A;B6	0	-	2
1437	1437C>T	C1437T	1	A2a	0	-	1
1440	1440G>A	G1440A	0	-	1	A4	1
1457	1457C>T	C1457T	3	A1a3a;A2a;B1a1b1	0	-	3
1469	1469C>T	C1469T	2	A2a4;A2a19	0	-	2
1471	1471C>T	C1471T	1	A2a2a1a	0	-	1
1477	1477T>A	T1477A	1	A1a3a	0	-	1
1487	1487G>A	G1487A	1	A2a4	0	-	1
1514	1514C>T	C1514T	1	A2a4a	0	-	1
1515	1515A>G	A1515G	1	A1a	1	A1a2a	2
1545	1545C>T	C1545T	2	A1a2;B1a1j	0	-	2
1547	1547A>G	A1547G	2	A2a2a;B1a1	0	-	2
1548	1548G>A	G1548A	1	B5	0	-	1
1555	1555C>A	C1555A	1	A2	0	-	1
1566	1566A>C	A1566C	1	B5	0	-	1
1570	1570T>C	T1570C	1	A1a2	0	-	1
1594	1594C>T	C1594T	1	A2a	0	-	1
1595	1595G>A	G1595A	1	A1b1	0	-	1
1616	1616C>T	C1616T	1	A2a8	0	-	1
1646	1646A>G	A1646G	1	B1a1	0	-	1
1663	1663C>T	C1663T	1	B5	0	-	1
1666	1666T>C	T1666C	1	A2a2a	0	-	1
1670	1670C>T	C1670T	1	B1a1	0	-	1
1684	1684C>T	C1684T	1	A2a2a	0	-	1
1691	1691A>G	A1691G	2	A;B	0	-	2
1707	1707C>T	C1707T	2	A6;B3a	0	-	2
1714	1714C>T	C1714T	1	A2a9	0	-	1
1734	1734C>T	C1734T	1	A	0	-	1
1740	1740A>C	A1740C	1	B	0	-	1
1758	1758C>T	C1758T	1	A	0	-	1
1779	1779C>T	C1779T	1	B7	0	-	1
1805	1805G>A	G1805A	1	A3a1a	0	-	1
1820	1820G>A	G1820A	4	A1a;A1a2a1;A1a3a;A2a2a8	0	-	4
1874	1874G>A	G1874A	1	A2a2a	0	-	1
1887	1887C>T	C1887T	1	A2a2a	0	-	1
1911	1911C>T	C1911T	2	A4;B1a1	0	-	2
1912	1912C>T	C1912T	3	A;A2a3a;A2a4f	1	A9b	4
1917	1917C>T	C1917T	0	-	1	A2a2a7	1
1929	1929C>T	C1929T	2	B1a1g;B4b	0	-	2
1944	1944G>A	G1944A	1	A1a2a1	0	-	1
1957	1957G>T	G1957T	1	A2a2b1	0	-	1
1968	1968C>T	C1968T	1	A2a15a	0	-	1
2003	2003C>T	C2003T	1	A2a2a15	0	-	1
2018	2018A>G	A2018G	1	A2a2a	0	-	1
2061	2061C>T	C2061T	1	B1a1c	0	-	1
2070	2070C>T	C2070T	1	A2a14a	0	-	1
2091	2091C>T	C2091T	3	A1a2;A2a2c2;A6	0	-	3
2094	2094C>T	C2094T	2	A2a4;A2a11	0	-	2
2113	2113C>T	C2113T	3	A2a2b1;A3a1;A3a1a5	0	-	3
2153	2153T>A	T2153A	1	B1a1	0	-	1
2164	2164G>A	G2164A	1	A2a4	0	-	1
2165	2165A>G	A2165G	1	A2a2a	0	-	1
2219	2219A>G	A2219G	1	A2a2a	0	-	1
2227	2227C>T	C2227T	1	A2a5	0	-	1
2232	2232C>T	C2232T	1	B1a1c	0	-	1
2239	2239A>C	A2239C	1	A3a1a1	0	-	1
2281	2281G>T	G2281T	1	A2a2a	0	-	1
2293	2293G>T	G2293T	1	A2a	1	A7	2
2306	2306C>T	C2306T	1	A2a2a	0	-	1
2371	2371C>T	C2371T	1	A4a	0	-	1
2388	2388C>T	C2388T	1	A1a2	0	-	1
2416	2416C>T	C2416T	0	-	1	A2a2c	1
2422	2422G>A	G2422A	1	B1a1c	0	-	1
2445	2445C>T	C2445T	1	B2	0	-	1
2446	2446T>C	T2446C	1	A1a6	0	-	1
2447	2447G>A	G2447A	1	A2a4e	0	-	1
2455	2455C>T	C2455T	1	A2a	0	-	1
2469	2469C>T	C2469T	3	A2a2a15;A4;B1a1	0	-	3
2470	2470C>T	C2470T	1	A1a2	0	-	1
2471	2471C>T	C2471T	1	A2a14a	0	-	1
2476	2476A>G	A2476G	1	B	0	-	1
2480	2480A>G	A2480G	1	A1a	1	A1a3a	2
2500	2500A>G	A2500G	1	B1a1b	0	-	1
2507	2507C>T	C2507T	2	A2a4a;A2a4f	0	-	2
2518	2518G>A	G2518A	1	A2a2a	0	-	1
2522	2522A>G	A2522G	1	A2a2	0	-	1
2523	2523C>T	C2523T	0	-	1	A2a2a6	1
2527	2527G>T	G2527T	1	A2a	0	-	1
2528	2528G>A	G2528A	1	A3b	0	-	1
2558	2558C>T	C2558T	1	A1a	1	A1a3	2
2570	2570C>T	C2570T	1	A3a1a	0	-	1
2607	2607C>T	C2607T	1	A1a3a	0	-	1
2632	2632G>T	G2632T	1	A2a2a	0	-	1
2644	2644C>T	C2644T	1	A1a3a	0	-	1
2662	2662C>T	C2662T	1	B2	0	-	1
2668	2668C>T	C2668T	1	A1a2	0	-	1
2676	2676C>T	C2676T	1	B4a1	0	-	1
2695	2695C>T	C2695T	1	A1a2	0	-	1
2706	2706C>T	C2706T	1	A2a2a	0	-	1
2707	2707A>G	A2707G	1	A1	0	-	1
2717	2717G>A	G2717A	1	A1	0	-	1
2737	2737T>A	T2737A	1	A3b	0	-	1
2773	2773C>T	C2773T	1	A2a	0	-	1
2775	2775A>G	A2775G	1	A2a8	0	-	1
2780	2780G>T	G2780T	1	A2a5	0	-	1
2782	2782G>T	G2782T	1	B1a1	0	-	1
2786	2786A>G	A2786G	1	A2a2a	0	-	1
2801	2801G>A	G2801A	1	A10	0	-	1
2814	2814A>C	A2814C	1	A10	0	-	1
2869	2869A>G	A2869G	1	A2a4	0	-	1
2891	2891G>A	G2891A	0	-	1	A4	1
2918	2918C>T	C2918T	1	A1a3a	0	-	1
2922	2922T>C	T2922C	1	B	0	-	1
2937	2937C>T	C2937T	1	A2a5	0	-	1
2939	2939C>T	C2939T	1	A2a2a	0	-	1
2940	2940C>T	C2940T	1	A2a	0	-	1
2973	2973C>T	C2973T	1	A2a4	0	-	1
2992	2992T>C	T2992C	1	B1a1	0	-	1
2997	2997C>T	C2997T	1	A2a4	0	-	1
3011	3011T>C	T3011C	2	A2;A2a	0	-	2
3014	3014G>A	G3014A	1	A2a2a8	0	-	1
3022	3022T>A	T3022A	1	A2a4	0	-	1
3025	3025G>T	G3025T	1	A2a4	0	-	1
3027	3027A>G	A3027G	1	A3	0	-	1
3034	3034T>C	T3034C	0	-	1	A1a2b	1
3037	3037C>T	C3037T	0	-	1	A2	1
3040	3040C>T	C3040T	1	A3a1a1	0	-	1
3046	3046A>G	A3046G	1	B1a1	0	-	1
3076	3076A>T	A3076T	1	A2a4d	0	-	1
3086	3086T>C	T3086C	1	B	0	-	1
3096	3096C>T	C3096T	0	-	1	A1a4a	1
3099	3099C>T	C3099T	2	A;A3	0	-	2
3100	3100T>G	T3100G	1	A2a4c1	0	-	1
3130	3130C>T	C3130T	3	A2;A2a;A2a7	0	-	3
3132	3132A>G	A3132G	1	A3	0	-	1
3144	3144T>C	T3144C	1	A2a2a3	0	-	1
3145	3145G>T	G3145T	5	A2a;A2a4a;A2a4a4;A2a4b;A3a1a	0	-	5
3165	3165C>T	C3165T	1	A2a2a	0	-	1
3168	3168C>T	C3168T	1	A2a2c	0	-	1
3170	3170C>T	C3170T	1	A2a2	0	-	1
3171	3171T>C	T3171C	0	-	1	B8	1
3175	3175A>G	A3175G	1	B	0	-	1
3176	3176C>T	C3176T	3	A2a2a;A2a4;B	0	-	3
3177	3177C>T	C3177T	3	B5a;B5a1;B5a1a	0	-	3
3179	3179G>A	G3179A	1	B	0	-	1
3242	3242G>A	G3242A	1	A3a1a3	0	-	1
3253	3253C>T	C3253T	3	A2a2a;A2a4a3a;B1a1	0	-	3
3259	3259G>T	G3259T	1	A	0	-	1
3263	3263A>G	A3263G	1	A3a1a3	0	-	1
3283	3283T>A	T3283A	1	A1a3a	0	-	1
3307	3307G>A	G3307A	1	A2a2a	0	-	1
3350	3350A>G	A3350G	1	A2a4b1	0	-	1
3369	3369C>T	C3369T	1	A2a5	0	-	1
3373	3373C>A	C3373A	0	-	1	A2a4f	1
3375	3375A>C	A3375C	1	A9b	0	-	1
3376	3376T>C	T3376C	1	A2a	0	-	1
3393	3393C>T	C3393T	2	A2a;A2a4	0	-	2
3406	3406A>C	A3406C	1	B1a1g	0	-	1
3411	3411C>T	C3411T	1	A1a6	0	-	1
3419	3419G>A	G3419A	1	A2a4	0	-	1
3429	3429C>T	C3429T	1	A2a5	0	-	1
3450	3450A>G	A3450G	1	A2a2a	0	-	1
3472	3472A>G	A3472G	1	A3a1a1	0	-	1
3518	3518G>T	G3518T	1	A9	0	-	1
3539	3539G>T	G3539T	1	A1a3a	0	-	1
3558	3558A>G	A3558G	1	A2a4	0	-	1
3564	3564G>T	G3564T	1	A2a2a	0	-	1
3589	3589C>T	C3589T	1	B1a1	0	-	1
3593	3593C>T	C3593T	1	B1a1	0	-	1
3610	3610T>C	T3610C	1	A1a2c	0	-	1
3619	3619C>T	C3619T	1	A1a3a3	0	-	1
3625	3625A>C	A3625C	1	A2a4	0	-	1
3635	3635A>G	A3635G	1	B1a1	0	-	1
3725	3725T>G	T3725G	1	A2a1	0	-	1
3728	3728G>T	G3728T	1	A2a3	0	-	1
3732	3732C>T	C3732T	1	A2a4b	0	-	1
3738	3738C>T	C3738T	1	A	0	-	1
3768	3768C>T	C3768T	2	A;B	0	-	2
3778	3778A>G	A3778G	1	A	0	-	1
3784	3784C>T	C3784T	2	A2a;A2a5	0	-	2
3787	3787C>T	C3787T	2	A2a2a;A3	0	-	2
3792	3792C>T	C3792T	1	B2	0	-	1
3793	3793T>C	T3793C	3	A2a;A2a7;A2a15	0	-	3
3796	3796C>T	C3796T	1	A2a4	0	-	1
3830	3830A>G	A3830G	1	A2a1	0	-	1
3854	3854A>G	A3854G	1	A3c	0	-	1
3859	3859A>G	A3859G	2	A1a2;A1a2c	0	-	2
3860	3860G>A	G3860A	1	A6	0	-	1
3862	3862T>A	T3862A	1	A2a4a2	0	-	1
3866	3866C>G	C3866G	2	A1a2c;A2a4	0	-	2
3871	3871G>T	G3871T	0	-	1	A2a18	1
3885	3885C>A	C3885A	1	A12	0	-	1
3889	3889A>G	A3889G	1	B1a1	0	-	1
3977	3977G>A	G3977A	1	A2a4	0	-	1
3982	3982T>C	T3982C	1	A1a	0	-	1
3987	3987C>T	C3987T	3	A1a;A1a2a1;A2a3c	0	-	3
3992	3992C>T	C3992T	1	B1a1e	0	-	1
4002	4002C>T	C4002T	1	A2a4c1	0	-	1
4011	4011T>C	T4011C	1	A2a4	0	-	1
4015	4015A>T	A4015T	1	A1a3a	0	-	1
4015	4015A>G	A4015G	1	A2a2a	0	-	1
4047	4047G>A	G4047A	1	A2a3	0	-	1
4050	4050A>C	A4050C	12	A1a2c;A2;A2a1a;A2a2a;A2a3;A2a3a;A2a4;A2a4a;A2a4a1;A2a4f;A2a4k;A4	0	-	12
4053	4053T>C	T4053C	2	A2a4a;A2a4a1	0	-	2
4084	4084C>T	C4084T	1	B1a1	0	-	1
4113	4113C>T	C4113T	2	A2a2a;A2a2a4a	0	-	2
4127	4127G>A	G4127A	1	A3	0	-	1
4148	4148G>T	G4148T	1	B1a1	0	-	1
4158	4158C>T	C4158T	1	A3	0	-	1
4162	4162G>T	G4162T	1	A3	0	-	1
4180	4180G>A	G4180A	1	A2a5c	0	-	1
4201	4201G>T	G4201T	2	A2a7;A3	0	-	2
4205	4205G>A	G4205A	1	A2a	0	-	1
4207	4207G>T	G4207T	1	A1a3a2	0	-	1
4236	4236A>G	A4236G	1	A1a	0	-	1
4255	4255G>T	G4255T	1	A2a	1	A2a1a	2
4255	4255G>A	G4255A	2	A3a1;A3a1a	0	-	2
4258	4258T>C	T4258C	1	A2a3	0	-	1
4261	4261G>A	G4261A	1	A2a4	0	-	1
4276	4276C>T	C4276T	1	A2a1	0	-	1
4281	4281T>A	T4281A	1	A1	0	-	1
4316	4316A>G	A4316G	1	A2a2c	0	-	1
4320	4320C>T	C4320T	1	A2a2a	1	A2a2a1a	2
4320	4320C>A	C4320A	1	A3b	0	-	1
4321	4321C>T	C4321T	1	A2a2b	0	-	1
4396	4396A>G	A4396G	1	A2a	0	-	1
4400	4400C>T	C4400T	1	B5a1a	0	-	1
4402	4402T>C	T4402C	0	-	1	B7	1
4423	4423C>T	C4423T	1	A1a3a	0	-	1
4426	4426A>G	A4426G	1	A1	0	-	1
4436	4436G>A	G4436A	1	B1a1b	0	-	1
4444	4444G>T	G4444T	1	A2a4	0	-	1
4456	4456C>T	C4456T	1	A2a2a	0	-	1
4463	4463T>C	T4463C	1	A9a	0	-	1
4473	4473A>G	A4473G	1	A	0	-	1
4487	4487G>A	G4487A	1	A2a	0	-	1
4494	4494A>G	A4494G	1	B1a1	0	-	1
4510	4510G>T	G4510T	2	A1a3a;A2a2c	0	-	2
4523	4523G>A	G4523A	1	A2a2c	0	-	1
4540	4540C>T	C4540T	0	-	1	B3a1	1
4543	4543C>G	C4543G	1	A2	0	-	1
4582	4582C>T	C4582T	1	A2a4b1	0	-	1
4586	4586C>T	C4586T	1	A2a2	0	-	1
4596	4596C>T	C4596T	1	A9a	0	-	1
4621	4621T>C	T4621C	1	A2a2a	0	-	1
4626	4626C>A	C4626A	1	A2a2a	0	-	1
4633	4633C>T	C4633T	1	B1a1f	0	-	1
4638	4638A>G	A4638G	1	A2a4	0	-	1
4639	4639T>A	T4639A	1	A2	0	-	1
4655	4655C>T	C4655T	2	A4;B	0	-	2
4665	4665G>A	G4665A	1	B4a	0	-	1
4683	4683C>T	C4683T	2	A2a2a9;B1a1	0	-	2
4684	4684T>C	T4684C	1	A2a3e	0	-	1
4704	4704C>T	C4704T	1	A2a	0	-	1
4720	4720G>T	G4720T	1	A4c	0	-	1
4728	4728G>T	G4728T	1	A2a2a	0	-	1
4755	4755C>T	C4755T	1	B1a1	0	-	1
4779	4779T>C	T4779C	1	B1a1	0	-	1
4780	4780C>T	C4780T	1	A2a4	0	-	1
4795	4795C>T	C4795T	1	A4a	0	-	1
4809	4809C>T	C4809T	0	-	1	A2a17	1
4810	4810C>T	C4810T	1	A2a2a	0	-	1
4886	4886C>T	C4886T	1	A2a12a	0	-	1
4912	4912A>C	A4912C	1	A1a3a2	0	-	1
4951	4951G>A	G4951A	1	A2a2a	0	-	1
4992	4992A>C	A4992C	1	A2a2	0	-	1
5000	5000C>T	C5000T	2	A3;B1a1f	0	-	2
5025	5025C>T	C5025T	1	A8	0	-	1
5031	5031C>T	C5031T	1	A1a3a	0	-	1
5053	5053A>G	A5053G	1	A3a1a4	0	-	1
5062	5062G>T	G5062T	0	-	1	B7	1
5084	5084A>G	A5084G	0	-	1	A9a	1
5140	5140C>T	C5140T	1	A2a4	0	-	1
5142	5142C>T	C5142T	0	-	1	A1a1	1
5144	5144C>T	C5144T	1	A4	0	-	1
5155	5155G>A	G5155A	1	A	0	-	1
5170	5170C>T	C5170T	1	B1a	0	-	1
5183	5183C>T	C5183T	1	A2a2a	0	-	1
5184	5184C>T	C5184T	1	B1a1	0	-	1
5223	5223C>T	C5223T	1	A3a1a	0	-	1
5239	5239C>T	C5239T	1	A10	0	-	1
5281	5281C>T	C5281T	1	B1a1i1	0	-	1
5284	5284C>T	C5284T	3	A2a;A2a19;A3	0	-	3
5290	5290T>C	T5290C	1	B3a	0	-	1
5301	5301C>T	C5301T	1	A1a3a	0	-	1
5317	5317A>T	A5317T	1	A1a2a1	0	-	1
5322	5322T>A	T5322A	2	A2a4a1;A2a7	0	-	2
5325	5325A>T	A5325T	1	A2a7	0	-	1
5340	5340C>T	C5340T	1	A1a3a	0	-	1
5348	5348C>T	C5348T	1	A2a2a	0	-	1
5357	5357G>T	G5357T	1	A1a	0	-	1
5365	5365C>T	C5365T	1	A2a4	0	-	1
5392	5392C>T	C5392T	1	A2a2b	0	-	1
5399	5399G>T	G5399T	1	A3a1a2	0	-	1
5457	5457C>T	C5457T	1	A2a3	0	-	1
5457	5457C>A	C5457A	1	A2a4	0	-	1
5466	5466A>G	A5466G	1	A2a2b	0	-	1
5467	5467C>T	C5467T	2	A3a1a3;A4a	0	-	2
5508	5508T>C	T5508C	1	A1	0	-	1
5536	5536A>G	A5536G	1	A	0	-	1
5539	5539G>A	G5539A	1	A1a	0	-	1
5544	5544C>T	C5544T	1	A2a	0	-	1
5547	5547C>T	C5547T	1	A2a4	0	-	1
5572	5572G>T	G5572T	0	-	1	A1a6	1
5573	5573T>C	T5573C	1	A2a4b	0	-	1
5608	5608A>G	A5608G	1	A2a2a	0	-	1
5622	5622C>T	C5622T	1	B1a1c	0	-	1
5654	5654C>T	C5654T	4	A2a2a;A2a2c;A2a4;A2a4f	0	-	4
5657	5657G>A	G5657A	1	B	0	-	1
5696	5696C>T	C5696T	1	A11	0	-	1
5704	5704G>T	G5704T	1	A1a3a	0	-	1
5707	5707T>C	T5707C	1	A2a2a	0	-	1
5730	5730C>T	C5730T	2	A2a2a15;A2a4	0	-	2
5784	5784C>T	C5784T	0	-	1	B1a1g	1
5826	5826C>T	C5826T	1	A2a14a	0	-	1
5845	5845A>T	A5845T	2	A;A3	0	-	2
5855	5855A>G	A5855G	1	A2a4	0	-	1
5860	5860T>C	T5860C	1	B1a1	0	-	1
5861	5861G>A	G5861A	1	A2a2a	0	-	1
5869	5869C>T	C5869T	3	A2a2a;A2a14a;A3a1a	0	-	3
5880	5880G>A	G5880A	1	A1a1	0	-	1
5937	5937A>C	A5937C	1	A2a2c	0	-	1
5941	5941T>G	T5941G	1	B1a1	0	-	1
5950	5950G>T	G5950T	1	A1a2c	0	-	1
5974	5974C>T	C5974T	1	A1a4	0	-	1
6025	6025T>C	T6025C	1	B1	0	-	1
6026	6026C>T	C6026T	1	A	0	-	1
6027	6027C>T	C6027T	1	A1a	0	-	1
6040	6040C>T	C6040T	1	B5a1	0	-	1
6051	6051A>C	A6051C	1	A2a4d	0	-	1
6052	6052G>A	G6052A	1	A2a2	0	-	1
6079	6079T>C	T6079C	1	A1a2a1	0	-	1
6080	6080G>A	G6080A	1	A4a1	0	-	1
6133	6133A>G	A6133G	1	A2a2a	0	-	1
6145	6145C>T	C6145T	1	A2a4b1	0	-	1
6187	6187C>T	C6187T	1	A1	0	-	1
6190	6190C>T	C6190T	1	A2a5	0	-	1
6220	6220G>A	G6220A	1	B1a1	0	-	1
6248	6248A>C	A6248C	1	A2a5	0	-	1
6255	6255C>T	C6255T	4	A2a2a;A2a4a;B;B4b	0	-	4
6266	6266G>A	G6266A	2	A2a2a;A9b	0	-	2
6285	6285C>T	C6285T	1	B1a1	0	-	1
6286	6286C>T	C6286T	1	A2a5	0	-	1
6310	6310C>T	C6310T	1	A2a3	1	B1a1i	2
6310	6310C>A	C6310A	1	A3b	0	-	1
6312	6312C>A	C6312A	0	-	1	A3b	1
6317	6317C>T	C6317T	2	A1a2b;B1a1	0	-	2
6324	6324A>G	A6324G	1	A2a2a4a	0	-	1
6329	6329T>C	T6329C	1	B4a1	0	-	1
6361	6361C>T	C6361T	1	A1	0	-	1
6363	6363C>T	C6363T	1	B6	0	-	1
6400	6400A>G	A6400G	1	A2a2a	0	-	1
6402	6402C>T	C6402T	1	A2a2a3	0	-	1
6424	6424A>C	A6424C	1	B1a1b	0	-	1
6428	6428C>T	C6428T	2	A2a;B4b	0	-	2
6445	6445C>T	C6445T	1	A2a2a	0	-	1
6449	6449C>T	C6449T	2	A2a2b;B9	0	-	2
6474	6474A>G	A6474G	2	A;A1a3a	0	-	2
6501	6501C>T	C6501T	1	B	0	-	1
6504	6504C>T	C6504T	1	A2a	0	-	1
6513	6513G>T	G6513T	1	A12	0	-	1
6532	6532G>T	G6532T	1	A2a3f	0	-	1
6552	6552T>G	T6552G	1	A2a4a	0	-	1
6573	6573C>T	C6573T	2	A2a;A2a4	0	-	2
6628	6628C>T	C6628T	1	A2a4	0	-	1
6636	6636C>T	C6636T	2	A;A3	0	-	2
6638	6638C>T	C6638T	1	A2a2a12	0	-	1
6666	6666C>T	C6666T	1	A2a2c	0	-	1
6670	6670G>T	G6670T	1	B1a1c	0	-	1
6693	6693A>G	A6693G	1	B1a1	0	-	1
6696	6696C>T	C6696T	2	A2a5;B1a1	0	-	2
6723	6723C>T	C6723T	1	A2a	0	-	1
6762	6762C>T	C6762T	2	A2a2b;A2a3	0	-	2
6813	6813C>T	C6813T	1	B1a1	0	-	1
6814	6814T>C	T6814C	1	A2a2a	0	-	1
6819	6819G>T	G6819T	1	A10	0	-	1
6825	6825A>C	A6825C	1	A2a2a	0	-	1
6846	6846T>C	T6846C	1	A	0	-	1
6861	6861C>T	C6861T	1	A2a4b	0	-	1
6884	6884G>T	G6884T	1	A2a2a	0	-	1
6954	6954T>C	T6954C	1	A4a	0	-	1
6956	6956A>C	A6956C	1	A2a8	0	-	1
6968	6968C>A	C6968A	2	A;B1a1	0	-	2
6971	6971T>C	T6971C	0	-	1	A1a3a1	1
6975	6975G>T	G6975T	2	A2a;B1a1	1	A1a3a1	3
6977	6977G>A	G6977A	1	A2a	1	A1a3a1	2
6990	6990C>T	C6990T	5	A1a3a2;A1a5;A2a;A2a2a;B1a1a	0	-	5
6996	6996T>C	T6996C	1	A	0	-	1
7007	7007G>A	G7007A	1	B9	0	-	1
7011	7011C>T	C7011T	1	A1a3a	1	A4b	2
7016	7016G>A	G7016A	1	A	0	-	1
7042	7042G>T	G7042T	1	B1a1	0	-	1
7063	7063C>T	C7063T	1	A2a	0	-	1
7079	7079A>G	A7079G	1	B1a1	0	-	1
7083	7083C>T	C7083T	1	A2a4i	0	-	1
7084	7084T>C	T7084C	1	B1a1	0	-	1
7093	7093C>T	C7093T	2	A2a2;A3b	0	-	2
7105	7105C>T	C7105T	1	A3	0	-	1
7128	7128G>A	G7128A	1	A1a2	0	-	1
7144	7144T>A	T7144A	1	A9a	0	-	1
7147	7147T>C	T7147C	1	A10	0	-	1
7156	7156T>A	T7156A	1	A1	0	-	1
7165	7165C>T	C7165T	1	A2a5	0	-	1
7178	7178G>C	G7178C	1	A1	0	-	1
7200	7200C>T	C7200T	1	B1a1	0	-	1
7224	7224C>T	C7224T	1	A2a2c	0	-	1
7225	7225T>C	T7225C	2	A3a1;A3a1a	0	-	2
7239	7239C>T	C7239T	1	A	0	-	1
7286	7286C>A	C7286A	1	A2a4c1	0	-	1
7291	7291A>G	A7291G	1	A2a2a4a	0	-	1
7299	7299C>T	C7299T	1	A3a1a	0	-	1
7334	7334C>T	C7334T	1	A1a2d	0	-	1
7390	7390C>T	C7390T	1	A1a	0	-	1
7392	7392C>T	C7392T	1	A2a	0	-	1
7398	7398C>T	C7398T	1	A1b	0	-	1
7420	7420C>T	C7420T	2	A2a2a14;A6	0	-	2
7428	7428C>T	C7428T	1	A4	0	-	1
7438	7438T>C	T7438C	1	A2a4c1a	1	A2a13	2
7479	7479A>G	A7479G	0	-	1	A1a2d	1
7504	7504C>T	C7504T	1	A2a5	0	-	1
7518	7518C>T	C7518T	2	A2a2a;B1a1h	0	-	2
7528	7528C>T	C7528T	1	A2a9	0	-	1
7564	7564C>T	C7564T	0	-	1	A2a4e	1
7728	7728C>T	C7728T	1	A2a4	0	-	1
7732	7732C>T	C7732T	1	A2a4a	0	-	1
7765	7765C>T	C7765T	1	A2a2c	1	A2a2b1	2
7770	7770A>G	A7770G	1	A2a2a12	0	-	1
7798	7798G>T	G7798T	2	A2a4;B1a1	0	-	2
7815	7815C>T	C7815T	1	A11	0	-	1
7819	7819C>T	C7819T	1	A2a2c	0	-	1
7829	7829G>T	G7829T	1	A2a3	0	-	1
7844	7844C>A	C7844A	1	A2a3	0	-	1
7866	7866G>T	G7866T	1	A	0	-	1
7876	7876T>A	T7876A	1	A1a	0	-	1
7938	7938C>G	C7938G	1	A6	0	-	1
7945	7945C>T	C7945T	2	B1a1b;B1a1j	0	-	2
8001	8001A>C	A8001C	1	A	0	-	1
8004	8004T>A	T8004A	1	A2a4	0	-	1
8004	8004T>C	T8004C	1	A3	0	-	1
8022	8022T>G	T8022G	3	A2a4;A2a4a1;A2a4f	0	-	3
8025	8025C>T	C8025T	1	A2a5c	0	-	1
8051	8051A>G	A8051G	1	A2a4a	0	-	1
8072	8072A>G	A8072G	2	A2a;A2a4	0	-	2
8078	8078C>T	C8078T	2	A1a3a;B1a1	0	-	2
8083	8083G>T	G8083T	1	B1a1e	0	-	1
8090	8090C>T	C8090T	1	A1a2	0	-	1
8102	8102G>T	G8102T	1	A2a2a	0	-	1
8139	8139C>T	C8139T	1	A2a2a	0	-	1
8140	8140C>T	C8140T	2	A2a;A2a4	0	-	2
8156	8156T>G	T8156G	1	A2a3	0	-	1
8173	8173A>T	A8173T	1	B	0	-	1
8203	8203A>G	A8203G	1	A2a5a	0	-	1
8274	8274G>A	G8274A	1	A	0	-	1
8290	8290C>T	C8290T	2	A1a2;A2a3	0	-	2
8293	8293C>T	C8293T	2	A2a1;A2a4b1	0	-	2
8323	8323T>C	T8323C	1	A3	0	-	1
8327	8327C>T	C8327T	1	A12	0	-	1
8357	8357C>T	C8357T	1	A2a4	0	-	1
8371	8371G>T	G8371T	0	-	1	A2a2c2	1
8388	8388A>G	A8388G	1	A	0	-	1
8394	8394C>T	C8394T	1	A2a3c	0	-	1
8422	8422G>A	G8422A	1	A4	0	-	1
8467	8467A>G	A8467G	1	A1a2	0	-	1
8566	8566T>C	T8566C	1	A2a2a	0	-	1
8599	8599T>C	T8599C	2	A1a;A1a3a	0	-	2
8602	8602G>A	G8602A	1	B1a1	0	-	1
8626	8626C>T	C8626T	1	B1a1	0	-	1
8637	8637C>T	C8637T	1	A2a	0	-	1
8651	8651A>C	A8651C	1	A2a3	0	-	1
8653	8653G>T	G8653T	1	A3a1	1	A3a1a1	2
8655	8655C>T	C8655T	1	B1a1e	0	-	1
8662	8662T>A	T8662A	1	A1a	0	-	1
8671	8671T>G	T8671G	1	A2a4k	0	-	1
8676	8676G>T	G8676T	1	A2a2a	0	-	1
8687	8687G>A	G8687A	1	A2a1a	0	-	1
8752	8752C>T	C8752T	1	A2a5	0	-	1
8767	8767T>C	T8767C	2	B;B1a1a	0	-	2
8782	8782C>T	C8782T	2	A2a;A2a17	1	B	3
8800	8800T>C	T8800C	1	A9a	0	-	1
8818	8818C>T	C8818T	2	A2a3;A11	0	-	2
8874	8874C>T	C8874T	1	B3a	0	-	1
8880	8880C>T	C8880T	1	A3a1a3	0	-	1
8888	8888C>G	C8888G	1	A1a	0	-	1
8911	8911G>T	G8911T	1	A2a2a2	0	-	1
8916	8916T>G	T8916G	1	A	0	-	1
8917	8917C>T	C8917T	1	A1a3a	0	-	1
8924	8924A>G	A8924G	1	B	0	-	1
8926	8926A>T	A8926T	1	B	0	-	1
8945	8945A>G	A8945G	1	A2a4	0	-	1
8950	8950C>T	C8950T	1	B5a1	0	-	1
8981	8981A>G	A8981G	1	A3a1a3	0	-	1
8987	8987T>A	T8987A	1	A	0	-	1
9013	9013T>A	T9013A	1	B	0	-	1
9034	9034A>G	A9034G	1	A	0	-	1
9049	9049G>T	G9049T	1	A2a4a	0	-	1
9092	9092G>A	G9092A	1	A2a2c1a	0	-	1
9111	9111G>A	G9111A	1	A1a3a	0	-	1
9113	9113C>T	C9113T	2	A4;B5a1a	0	-	2
9130	9130G>T	G9130T	1	A2a2	0	-	1
9141	9141G>A	G9141A	1	A3	0	-	1
9157	9157T>C	T9157C	1	A3	0	-	1
9165	9165C>T	C9165T	1	A2a	0	-	1
9166	9166C>T	C9166T	1	A2a2a4a	0	-	1
9170	9170C>T	C9170T	1	A2a4i	1	A1a3a1	2
9172	9172T>C	T9172C	1	A2a4	0	-	1
9180	9180C>T	C9180T	1	B1a1	0	-	1
9190	9190G>T	G9190T	1	A1a2	0	-	1
9204	9204A>G	A9204G	1	B	0	-	1
9208	9208T>C	T9208C	1	A2a2	0	-	1
9223	9223C>T	C9223T	3	A;A1a2a;A3c1	1	A1a2a1	4
9238	9238A>G	A9238G	1	A2	0	-	1
9246	9246C>T	C9246T	1	A2a4j	0	-	1
9259	9259A>G	A9259G	1	B5	0	-	1
9274	9274A>G	A9274G	1	A1	0	-	1
9283	9283T>G	T9283G	1	A2a4	0	-	1
9307	9307A>G	A9307G	1	B1a1b	0	-	1
9319	9319C>T	C9319T	2	A3a1;A3a1a	0	-	2
9333	9333C>T	C9333T	2	A3;A3a1a	0	-	2
9370	9370T>G	T9370G	1	B4a	0	-	1
9388	9388G>T	G9388T	1	A1a	0	-	1
9429	9429T>C	T9429C	1	A2a4g	0	-	1
9430	9430C>T	C9430T	2	A2a2c;B3a	0	-	2
9430	9430C>A	C9430A	1	B1a1	0	-	1
9437	9437A>T	A9437T	1	A	0	-	1
9438	9438C>T	C9438T	2	A1a2a1;A3	0	-	2
9442	9442C>T	C9442T	1	A	0	-	1
9445	9445T>C	T9445C	0	-	1	B1a1b1	1
9474	9474C>T	C9474T	3	A;A3;A3a1a	0	-	3
9477	9477T>A	T9477A	0	-	1	B3	1
9479	9479G>T	G9479T	1	A3a1a3	0	-	1
9483	9483A>G	A9483G	2	A3a1;A3a1a5	0	-	2
9491	9491C>T	C9491T	1	A	0	-	1
9514	9514A>G	A9514G	0	-	1	A3a1a3	1
9526	9526G>T	G9526T	1	A4	0	-	1
9534	9534C>T	C9534T	1	A	0	-	1
9534	9534C>A	C9534A	1	A2a2b	0	-	1
9541	9541C>T	C9541T	4	A2a1;A2a3;A2a4;A2a12a	0	-	4
9561	9561C>T	C9561T	2	A4;B2	0	-	2
9565	9565C>T	C9565T	1	B1a1	0	-	1
9574	9574T>C	T9574C	1	A3a1	0	-	1
9634	9634A>T	A9634T	1	A1a3a	0	-	1
9693	9693C>T	C9693T	2	A3a1a;B1a1	0	-	2
9697	9697T>C	T9697C	1	A11	0	-	1
9724	9724C>T	C9724T	1	A1a3a	0	-	1
9733	9733C>T	C9733T	3	A2a4;A2a4f;B1a1	0	-	3
9743	9743T>C	T9743C	1	A3a1a5	0	-	1
9749	9749A>G	A9749G	1	A3a1a2	0	-	1
9802	9802G>T	G9802T	1	A	0	-	1
9803	9803C>T	C9803T	3	A2a;A2a2a;B1a1b	0	-	3
9836	9836C>T	C9836T	1	B1a1g	0	-	1
9856	9856G>T	G9856T	1	A2a4	0	-	1
9857	9857C>T	C9857T	1	A4a	0	-	1
9863	9863C>T	C9863T	1	A2a2a	0	-	1
9877	9877T>C	T9877C	1	A1a3a	0	-	1
9890	9890G>T	G9890T	1	B	0	-	1
9894	9894T>G	T9894G	1	A4c	0	-	1
9924	9924C>T	C9924T	1	A	0	-	1
9925	9925A>T	A9925T	1	A1a3a2	0	-	1
9931	9931T>C	T9931C	1	A3a1a3	0	-	1
9951	9951C>T	C9951T	1	A	0	-	1
9962	9962C>T	C9962T	2	A1;A1a	1	A1b1	3
9967	9967C>T	C9967T	1	A3b	0	-	1
10015	10015C>T	C10015T	1	A2a2a4a	0	-	1
10029	10029C>T	C10029T	1	A3a1a1	0	-	1
10036	10036C>T	C10036T	1	A	0	-	1
10038	10038C>T	C10038T	1	B4a	0	-	1
10078	10078C>T	C10078T	1	A2a2a	0	-	1
10097	10097G>A	G10097A	1	A2a4c1a	1	A2a4c1	2
10098	10098G>A	G10098A	1	A1a	0	-	1
10138	10138C>T	C10138T	3	A1;A2a2a;A2a2a7	0	-	3
10156	10156C>T	C10156T	1	B3a	0	-	1
10188	10188C>T	C10188T	1	A2a2a9	0	-	1
10228	10228C>T	C10228T	1	B1a1f	0	-	1
10232	10232C>T	C10232T	2	A;A1a3a	0	-	2
10265	10265G>A	G10265A	0	-	1	A2a4h	1
10277	10277C>T	C10277T	1	A2a2a	0	-	1
10284	10284T>C	T10284C	1	A4	0	-	1
10319	10319C>T	C10319T	2	A1a;A2a2a9	0	-	2
10323	10323A>G	A10323G	6	A1a2;A2a3;A3a1a;A4;A4a1;B1a1f	1	A2a5a	7
10350	10350C>T	C10350T	1	A2a3c	0	-	1
10368	10368G>A	G10368A	2	A2a5c;B9	0	-	2
10369	10369C>T	C10369T	1	B1a1c	0	-	1
10376	10376C>T	C10376T	1	A2a2a5	0	-	1
10449	10449C>T	C10449T	1	A2a2a	0	-	1
10450	10450C>T	C10450T	2	A2a;A2a2c	0	-	2
10480	10480T>C	T10480C	1	A1a3a	0	-	1
10507	10507C>T	C10507T	2	A3;A4	0	-	2
10523	10523G>A	G10523A	1	B3a	0	-	1
10561	10561T>C	T10561C	2	A2a3;A2a3b	0	-	2
10572	10572C>T	C10572T	1	B1a1	0	-	1
10582	10582C>T	C10582T	0	-	1	A2a2a15	1
10604	10604C>T	C10604T	1	A	0	-	1
10605	10605C>T	C10605T	1	A2a5	0	-	1
10626	10626C>T	C10626T	1	A2a2c	0	-	1
10630	10630A>G	A10630G	1	A2a4	0	-	1
10632	10632C>T	C10632T	1	B1a1	0	-	1
10641	10641C>T	C10641T	1	A1a1	0	-	1
10712	10712C>T	C10712T	1	A2a2c	0	-	1
10728	10728C>T	C10728T	1	A2a8	0	-	1
10741	10741C>T	C10741T	3	A1a;A2a4a2;B	0	-	3
10763	10763T>C	T10763C	1	B1a1e	0	-	1
10771	10771T>C	T10771C	0	-	1	B1a1a	1
10789	10789C>T	C10789T	2	A3a1a;B1a1	0	-	2
10818	10818C>T	C10818T	1	B1a1	0	-	1
10825	10825T>A	T10825A	1	A1a3a	0	-	1
10834	10834C>T	C10834T	1	A2a4j	0	-	1
10851	10851C>T	C10851T	0	-	1	A2a2a8	1
10870	10870G>T	G10870T	2	A2a2a;A2a4	0	-	2
10874	10874A>G	A10874G	2	A2a2;A2a2c	0	-	2
10912	10912A>G	A10912G	1	A3a1a	0	-	1
10948	10948A>G	A10948G	1	A2a4	0	-	1
10990	10990A>G	A10990G	1	A2a	0	-	1
10995	10995A>G	A10995G	1	A11	0	-	1
10999	10999T>A	T10999A	1	B5	0	-	1
11003	11003C>T	C11003T	1	A2a2a	0	-	1
11020	11020C>T	C11020T	2	A1a;A2a2a1a	0	-	2
11032	11032T>C	T11032C	1	A3a1a	0	-	1
11042	11042G>T	G11042T	1	B1a1b	0	-	1
11067	11067C>T	C11067T	1	A3a1a1	0	-	1
11071	11071G>C	G11071C	1	A3a1	0	-	1
11074	11074C>T	C11074T	8	A1a2d;A1a3a;A1a4;A3a1;A3a1a;A3a1a4;A3a1a5;A4b	0	-	8
11083	11083G>T	G11083T	13	A1;A2a;A2a2a;A2a2a1a;A2a3b;A2a4;A2a4a;A2a4c1;A2a4h;A4b;B;B1a1;B2	2	A1a;A3	15
11083	T11083@>G	@T11083G	0	-	1	A1a2c	1
11090	11090A>T	A11090T	1	A1a3a	0	-	1
11095	11095C>T	C11095T	1	B1a1	0	-	1
11101	11101A>G	A11101G	1	A2a2a4a	0	-	1
11109	11109C>T	C11109T	1	A2a	0	-	1
11113	11113G>T	G11113T	1	A2a2c	0	-	1
11161	11161G>A	G11161A	1	B1a1	0	-	1
11182	11182T>C	T11182C	1	A1a3a3	0	-	1
11191	11191T>G	T11191G	1	A2a2a	0	-	1
11191	11191T>A	T11191A	1	A2a2a4a	0	-	1
11195	11195C>T	C11195T	1	A2a4f	0	-	1
11224	11224C>T	C11224T	1	A2a2a	0	-	1
11244	11244T>C	T11244C	1	A2a	0	-	1
11299	11299G>T	G11299T	1	A4	0	-	1
11310	11310G>T	G11310T	1	A3	0	-	1
11314	11314T>C	T11314C	1	A2a5	0	-	1
11320	11320T>C	T11320C	1	B1a1	0	-	1
11322	11322C>T	C11322T	1	A2a	0	-	1
11355	11355C>T	C11355T	2	A2a3;A2a3a	0	-	2
11356	11356A>T	A11356T	1	A2a2a	0	-	1
11376	11376G>T	G11376T	1	A1a3a	0	-	1
11396	11396C>G	C11396G	1	A1a2c	0	-	1
11405	11405G>A	G11405A	1	A1a3a	0	-	1
11410	11410G>A	G11410A	2	A;A3	0	-	2
11412	11412C>T	C11412T	1	A2a4a	0	-	1
11414	11414C>T	C11414T	1	A2a	0	-	1
11417	11417G>T	G11417T	3	A2a3;A2a5;A2a8	1	A2a16	4
11430	11430A>G	A11430G	0	-	1	B6	1
11438	11438A>G	A11438G	0	-	1	A2a4a4	1
11439	11439A>G	A11439G	1	A2a8	0	-	1
11515	11515T>A	T11515A	1	A2a2a	0	-	1
11522	11522T>G	T11522G	1	A2a2a4a	0	-	1
11527	11527G>T	G11527T	1	A2a	0	-	1
11538	11538T>C	T11538C	1	B1a1	0	-	1
11557	11557G>T	G11557T	1	A8	0	-	1
11572	11572C>T	C11572T	1	A2a4a	0	-	1
11575	11575C>A	C11575A	1	A1	0	-	1
11596	11596G>T	G11596T	1	A2a1	0	-	1
11620	11620C>T	C11620T	1	A2a4c1	0	-	1
11634	11634G>T	G11634T	1	A3a1a5	0	-	1
11636	11636A>T	A11636T	1	B	0	-	1
11638	11638T>C	T11638C	1	A2a4	0	-	1
11671	11671C>T	C11671T	1	A3	0	-	1
11674	11674C>T	C11674T	1	B1a1	0	-	1
11704	11704C>T	C11704T	4	A1b1;A2a5;A2a5c;B1a1	0	-	4
11707	11707A>G	A11707G	1	A	0	-	1
11709	11709T>A	T11709A	1	A3a1a	0	-	1
11719	11719G>A	G11719A	1	A2a5	0	-	1
11737	11737T>C	T11737C	1	A3	0	-	1
11747	11747C>T	C11747T	1	A	0	-	1
11750	11750C>T	C11750T	3	A;A3;A6	0	-	3
11752	11752C>T	C11752T	1	A	0	-	1
11764	11764T>A	T11764A	1	A	0	-	1
11781	11781A>G	A11781G	1	A1a3a	0	-	1
11782	11782A>G	A11782G	2	A;A12	0	-	2
11801	11801G>A	G11801A	2	A2a4b;A2a5c	0	-	2
11833	11833C>T	C11833T	1	A1a	0	-	1
11839	11839A>G	A11839G	0	-	1	A2a4b1	1
11842	11842G>A	G11842A	1	A2a4	0	-	1
11842	11842G>T	G11842T	1	A4	0	-	1
11858	11858G>A	G11858A	1	A2a3	0	-	1
11878	11878C>T	C11878T	1	A2a2a4a	0	-	1
11916	11916C>T	C11916T	0	-	1	A2a2a4	1
11919	11919C>T	C11919T	1	A2a2a	0	-	1
11935	11935A>C	A11935C	1	A2a3	0	-	1
11941	11941C>T	C11941T	1	A2a4	0	-	1
11956	11956C>T	C11956T	3	A;A2a14a;A3	0	-	3
11959	11959T>C	T11959C	1	A2a5	0	-	1
11962	11962C>T	C11962T	1	A	0	-	1
11991	11991A>G	A11991G	1	A1	0	-	1
12049	12049C>T	C12049T	1	A2a2a	0	-	1
12052	12052G>T	G12052T	1	A2a2a	0	-	1
12067	12067G>T	G12067T	1	A1a3a	0	-	1
12068	12068C>T	C12068T	1	A1a3a	0	-	1
12073	12073C>T	C12073T	1	A3a1a	0	-	1
12076	12076C>T	C12076T	2	B;B1a1a	0	-	2
12081	12081C>T	C12081T	1	A2a2a	0	-	1
12111	12111G>A	G12111A	1	A2a2a2	0	-	1
12116	12116C>T	C12116T	1	A2a2a15	0	-	1
12138	12138C>T	C12138T	2	A2a2b;A2a4	0	-	2
12141	12141C>A	C12141A	1	B	0	-	1
12153	12153C>T	C12153T	1	A2a2a4a	0	-	1
12244	12244T>C	T12244C	1	A2a7	0	-	1
12249	12249C>T	C12249T	1	A3a1a	0	-	1
12274	12274G>A	G12274A	1	A2a2c1a	0	-	1
12274	12274G>T	G12274T	1	B3a1	0	-	1
12350	12350A>C	A12350C	1	A	0	-	1
12357	12357C>T	C12357T	2	A2a4;A3a1a1	0	-	2
12364	12364T>A	T12364A	1	B9	0	-	1
12410	12410A>G	A12410G	1	A2a5c	0	-	1
12415	12415C>T	C12415T	1	A2a2a	0	-	1
12473	12473C>T	C12473T	2	A;A1	0	-	2
12478	12478G>A	G12478A	1	B5a1	0	-	1
12490	12490A>G	A12490G	1	A2a15a	0	-	1
12556	12556A>G	A12556G	1	A	0	-	1
12722	12722T>C	T12722C	1	A2a2c	0	-	1
12741	12741C>T	C12741T	1	B1a1b	0	-	1
12745	12745A>G	A12745G	1	A2a2c	0	-	1
12756	12756C>T	C12756T	2	A1b1;A2a	0	-	2
12778	12778C>T	C12778T	1	A12	0	-	1
12781	12781C>T	C12781T	2	A1a4a;B3a	0	-	2
12793	12793G>T	G12793T	1	A2a2a	0	-	1
12809	12809C>T	C12809T	1	A2a2a	0	-	1
12820	12820A>G	A12820G	1	A1a2	0	-	1
12832	12832G>A	G12832A	1	A2a4	0	-	1
12866	12866G>A	G12866A	1	A2a2a	0	-	1
12877	12877T>C	T12877C	1	B5	0	-	1
12880	12880C>T	C12880T	2	A2a;A2a11	0	-	2
12885	12885C>T	C12885T	1	A2a2a	0	-	1
12896	12896C>T	C12896T	1	A10	1	A9b	2
12915	12915C>T	C12915T	1	B1a1	0	-	1
12964	12964A>G	A12964G	1	A3	0	-	1
12970	12970C>T	C12970T	2	A2a;A2a2a	0	-	2
12995	12995G>C	G12995C	1	A2a2	0	-	1
13002	13002T>C	T13002C	1	A2	0	-	1
13006	13006T>C	T13006C	0	-	1	A2a2a1b	1
13019	13019C>T	C13019T	2	A2a;B1a1	0	-	2
13047	13047C>T	C13047T	1	A2a4	0	-	1
13051	13051C>T	C13051T	1	A2a3	0	-	1
13064	13064T>C	T13064C	1	A1a2a1	0	-	1
13078	13078T>C	T13078C	1	A1a2	0	-	1
13118	13118G>T	G13118T	1	B1a1b	0	-	1
13119	13119C>T	C13119T	1	A1a2	0	-	1
13126	13126G>T	G13126T	1	B1a1e	0	-	1
13138	13138C>T	C13138T	1	B1a1	0	-	1
13176	13176C>T	C13176T	1	A2a4	0	-	1
13183	13183G>A	G13183A	1	B2	0	-	1
13212	13212T>C	T13212C	1	A2a4b1	0	-	1
13216	13216T>G	T13216G	1	A2a4c1	0	-	1
13270	13270T>C	T13270C	1	A12	0	-	1
13273	13273T>C	T13273C	1	A2a2	0	-	1
13358	13358C>T	C13358T	1	A2a2a	0	-	1
13377	13377C>A	C13377A	1	A2a1	0	-	1
13401	13401A>T	A13401T	1	A1a	0	-	1
13402	13402T>G	T13402G	9	A;A1a3;A2a;A2a1a;A2a2a1a;A2a4;A2a4b1;A2a4f;A2a5	4	A1a2c;A2a3a;A2a4a1;A2a7	13
13408	13408T>C	T13408C	4	A2a3;A2a3c;A2a5;A2a11	0	-	4
13408	13408T>A	T13408A	2	A2a4a1;A2a7	0	-	2
13408	13408T>G	T13408G	1	A2a7	0	-	1
13410	13410G>C	G13410C	1	A2	0	-	1
13412	13412T>G	T13412G	1	A2a11	0	-	1
13458	13458C>T	C13458T	1	A2a2a	0	-	1
13501	13501C>T	C13501T	1	A2a4	0	-	1
13503	13503G>T	G13503T	1	A2a4	0	-	1
13506	13506C>T	C13506T	1	A3a1a1	0	-	1
13517	13517C>T	C13517T	1	A2a1a	0	-	1
13521	13521T>C	T13521C	1	A2a2a	0	-	1
13532	13532T>C	T13532C	1	A2a4f	0	-	1
13536	13536C>T	C13536T	2	A2a4c;A2a4c1	0	-	2
13555	13555A>T	A13555T	1	A	0	-	1
13571	13571G>T	G13571T	1	A6	0	-	1
13616	13616A>G	A13616G	1	A2a2	0	-	1
13617	13617G>T	G13617T	1	B9	0	-	1
13620	13620C>T	C13620T	1	A2a	0	-	1
13627	13627G>T	G13627T	1	A1a2	1	A1a4	2
13665	13665C>T	C13665T	1	A2a8	0	-	1
13679	13679A>G	A13679G	1	A10	0	-	1
13693	13693A>T	A13693T	2	A2a2a2;B1a1	0	-	2
13694	13694C>T	C13694T	1	B1	0	-	1
13712	13712A>G	A13712G	1	A2a2a	0	-	1
13721	13721C>T	C13721T	1	A1a3a3	0	-	1
13730	13730C>T	C13730T	0	-	1	A3b	1
13740	13740C>T	C13740T	2	A2a3;A2a7	0	-	2
13845	13845T>C	T13845C	1	B1a1	0	-	1
13862	13862C>T	C13862T	0	-	1	A2a19	1
13900	13900G>T	G13900T	1	A2a2a4a	0	-	1
13901	13901A>G	A13901G	1	B1a1j	0	-	1
13921	13921G>T	G13921T	1	A2a2a	0	-	1
13922	13922A>T	A13922T	1	A1a3	0	-	1
13929	13929T>C	T13929C	0	-	1	A1b	1
13947	13947A>T	A13947T	1	A2a	1	A2a4k	2
13951	13951A>T	A13951T	1	B5a1a	0	-	1
13966	13966G>A	G13966A	1	A2a4	0	-	1
13975	13975G>A	G13975A	1	A3b	0	-	1
14034	14034T>C	T14034C	1	A1a2	0	-	1
14073	14073T>C	T14073C	1	A2a5	1	A2a16	2
14104	14104T>C	T14104C	1	A2a2b	0	-	1
14120	14120C>T	C14120T	1	A2a3	0	-	1
14122	14122G>T	G14122T	1	A3a1a5	0	-	1
14126	14126G>A	G14126A	1	B1a1	0	-	1
14183	14183C>T	C14183T	1	A2a2a8	0	-	1
14197	14197G>A	G14197A	1	B1a1	0	-	1
14198	14198C>T	C14198T	1	A1a3a	0	-	1
14224	14224A>G	A14224G	1	A1a2a1	0	-	1
14229	14229G>T	G14229T	1	B1a1	0	-	1
14262	14262C>T	C14262T	1	A2a2a	0	-	1
14267	14267C>T	C14267T	1	A1a2	0	-	1
14270	14270A>C	A14270C	1	A2	0	-	1
14295	14295T>C	T14295C	1	A1a	0	-	1
14313	14313T>C	T14313C	1	A3b	0	-	1
14322	14322C>T	C14322T	1	B1a1b	0	-	1
14391	14391C>T	C14391T	1	A2a2a1b	0	-	1
14408	14408C>T	C14408T	2	A1a2;A2	1	A2a	3
14422	14422C>T	C14422T	1	B	0	-	1
14432	14432G>A	G14432A	1	B1a1	0	-	1
14485	14485A>G	A14485G	1	A2a3f	0	-	1
14500	14500G>T	G14500T	1	B3a	0	-	1
14535	14535A>G	A14535G	1	A2a2b1	0	-	1
14580	14580G>T	G14580T	1	A2a	0	-	1
14585	14585C>T	C14585T	1	B	0	-	1
14604	14604A>G	A14604G	1	B1a1	0	-	1
14638	14638G>T	G14638T	1	B1a1	0	-	1
14645	14645C>T	C14645T	1	A2a2a	0	-	1
14653	14653G>T	G14653T	1	A1a2	0	-	1
14653	14653G>A	G14653A	1	A3a1a	0	-	1
14676	14676C>T	C14676T	1	A	0	-	1
14688	14688C>T	C14688T	1	A2a4f	0	-	1
14709	14709T>C	T14709C	1	A2a4	0	-	1
14712	14712G>A	G14712A	1	A2a2a	0	-	1
14718	14718G>T	G14718T	1	A	0	-	1
14724	14724C>T	C14724T	4	A1;A1a;B1a;B1a1	1	A1b1	5
14773	14773G>A	G14773A	1	A2a3g	0	-	1
14786	14786C>T	C14786T	2	A2a2a;A2a4	1	A2a2c1a	3
14805	14805C>T	C14805T	1	B1a1	2	A1a;B3	3
14823	14823A>T	A14823T	1	A	0	-	1
14877	14877C>T	C14877T	2	A2a2a;B1a1	0	-	2
14887	14887T>C	T14887C	1	A2a	0	-	1
14889	14889C>T	C14889T	1	A6	0	-	1
14898	14898C>T	C14898T	1	A2a4	0	-	1
14907	14907T>G	T14907G	1	A2a2a2	0	-	1
14912	14912A>G	A14912G	1	A2a2a	0	-	1
14925	14925C>T	C14925T	1	A3a1a	1	A2a2a10	2
14937	14937C>T	C14937T	1	B1a1	0	-	1
14948	14948G>T	G14948T	1	A1	0	-	1
15017	15017C>T	C15017T	1	B7	0	-	1
15024	15024C>T	C15024T	1	A2a3d	0	-	1
15026	15026C>T	C15026T	1	A2a3a	0	-	1
15199	15199G>A	G15199A	1	B1a1h	0	-	1
15202	15202G>T	G15202T	1	A2a15a	0	-	1
15205	15205A>G	A15205G	1	B9	0	-	1
15213	15213A>G	A15213G	1	A2a2a	0	-	1
15222	15222C>T	C15222T	1	A1a2d	0	-	1
15237	15237C>T	C15237T	2	A1a2;A2a2	0	-	2
15240	15240C>T	C15240T	1	B1a1	0	-	1
15246	15246A>G	A15246G	1	A3c	0	-	1
15273	15273C>T	C15273T	1	A1	0	-	1
15277	15277C>T	C15277T	0	-	1	A2a3c	1
15324	15324C>T	C15324T	1	A2a4	2	A2a3;A8	3
15327	15327G>T	G15327T	1	A2a5	0	-	1
15328	15328C>T	C15328T	1	B3a1	0	-	1
15359	15359G>A	G15359A	1	B3a	0	-	1
15366	15366T>C	T15366C	1	A2a2c	0	-	1
15371	15371C>T	C15371T	1	A2a4	0	-	1
15380	15380G>T	G15380T	1	A2a2a	0	-	1
15407	15407C>T	C15407T	1	A2a4a	0	-	1
15418	15418G>T	G15418T	1	A3	0	-	1
15444	15444G>T	G15444T	1	A2a3e	0	-	1
15477	15477A>G	A15477G	1	A8	0	-	1
15480	15480C>T	C15480T	2	A1a5;B	0	-	2
15504	15504T>G	T15504G	1	A2a	0	-	1
15535	15535G>T	G15535T	1	A1a2	0	-	1
15540	15540C>T	C15540T	1	A1a2	1	A1a4	2
15575	15575G>T	G15575T	1	A2a1	0	-	1
15607	15607T>C	T15607C	1	B2	0	-	1
15641	15641A>C	A15641C	1	A	0	-	1
15654	15654C>T	C15654T	2	A2a2a;A2a4	0	-	2
15714	15714C>T	C15714T	1	A1	0	-	1
15720	15720C>T	C15720T	1	A2a2a9	0	-	1
15738	15738C>T	C15738T	1	B1a1	0	-	1
15752	15752C>T	C15752T	1	A2a2b2a	0	-	1
15755	15755C>T	C15755T	1	A1a3a	0	-	1
15760	15760G>A	G15760A	0	-	1	A2a2a11	1
15780	15780G>T	G15780T	1	A2a	0	-	1
15850	15850G>T	G15850T	1	A2a4	0	-	1
15852	15852C>T	C15852T	1	A2a4a	0	-	1
15857	15857C>T	C15857T	1	A2a8	0	-	1
15860	15860A>G	A15860G	0	-	1	A2a3f	1
15888	15888T>C	T15888C	1	B1a1	0	-	1
15898	15898G>T	G15898T	1	A2a	0	-	1
15907	15907G>A	G15907A	1	A3	0	-	1
15914	15914A>G	A15914G	1	A2a4	0	-	1
15927	15927T>G	T15927G	0	-	1	B1a1f	1
15928	15928C>T	C15928T	1	A2a2b1	0	-	1
15940	15940C>T	C15940T	1	A2a4a	0	-	1
15952	15952C>T	C15952T	2	A2a;A2a2a	0	-	2
15978	15978T>C	T15978C	1	A2a4	0	-	1
15982	15982G>T	G15982T	1	A2a3	0	-	1
16017	16017C>T	C16017T	1	A2a8	0	-	1
16054	16054C>T	C16054T	0	-	1	A1a2b	1
16075	16075G>T	G16075T	1	A4	0	-	1
16114	16114C>T	C16114T	1	A	0	-	1
16156	16156A>G	A16156G	1	B	0	-	1
16188	16188G>T	G16188T	1	A1	0	-	1
16192	16192C>T	C16192T	1	A2a	0	-	1
16206	16206G>T	G16206T	1	A2a2a6	0	-	1
16222	16222C>T	C16222T	1	A2a2a	0	-	1
16242	16242T>C	T16242C	1	B1a1	0	-	1
16260	16260C>T	C16260T	2	A2a;A2a2a3	0	-	2
16289	16289C>T	C16289T	0	-	1	A2a14a	1
16293	16293C>T	C16293T	1	A2a	0	-	1
16299	16299T>C	T16299C	1	B1a1	0	-	1
16308	16308C>T	C16308T	1	A12	0	-	1
16311	16311A>G	A16311G	1	A2a15	0	-	1
16329	16329C>T	C16329T	3	A2a2a;A4c;B1a1c	0	-	3
16335	16335T>G	T16335G	1	B1a1a	0	-	1
16342	16342T>C	T16342C	1	A2a3e	0	-	1
16381	16381G>A	G16381A	0	-	1	B4b	1
16386	16386C>T	C16386T	1	A2a4	0	-	1
16393	16393C>T	C16393T	1	A2a	0	-	1
16419	16419T>C	T16419C	1	A2a2a2	0	-	1
16422	16422A>C	A16422C	1	A2a4	0	-	1
16428	16428C>T	C16428T	1	B4b	0	-	1
16455	16455A>G	A16455G	1	A2a1	0	-	1
16456	16456T>G	T16456G	2	A2a;A2a1a	0	-	2
16457	16457C>T	C16457T	1	B1a1	0	-	1
16466	16466C>T	C16466T	1	B1a1	0	-	1
16467	16467A>G	A16467G	1	B1a1	0	-	1
16468	16468C>T	C16468T	2	A1a2;B1a	0	-	2
16469	16469C>T	C16469T	1	B1a1a	0	-	1
16474	16474A>G	A16474G	1	A	0	-	1
16515	16515T>C	T16515C	1	A2a8	0	-	1
16534	16534A>G	A16534G	1	A2a2a4a	0	-	1
16535	16535G>T	G16535T	1	A	0	-	1
16575	16575C>T	C16575T	1	A2a4b1	0	-	1
16701	16701T>C	T16701C	1	B1a1	0	-	1
16741	16741G>T	G16741T	1	A2a2b	0	-	1
16744	16744G>A	G16744A	1	A2a5	0	-	1
16762	16762C>T	C16762T	1	A2a3	0	-	1
16846	16846G>T	G16846T	2	A;A2a2c	0	-	2
16848	16848C>T	C16848T	1	A2a4	0	-	1
16853	16853G>T	G16853T	1	B4a	0	-	1
16858	16858G>T	G16858T	1	A2a15a	0	-	1
16864	16864G>A	G16864A	1	A2a4	0	-	1
16869	16869C>T	C16869T	1	A2a7	0	-	1
16877	16877C>T	C16877T	1	B	0	-	1
16887	16887C>T	C16887T	5	A;A1a7;A2a2a10;A2a4;B1a1h	1	A2a3b	6
16909	16909T>A	T16909A	1	B	0	-	1
16912	16912G>T	G16912T	1	A2a2a2	0	-	1
16949	16949C>T	C16949T	2	A2a4a2;A12	0	-	2
16975	16975G>T	G16975T	1	B1a1	0	-	1
17000	17000C>T	C17000T	1	A1	0	-	1
17002	17002C>T	C17002T	2	A2a4a;B5	0	-	2
17010	17010C>A	C17010A	0	-	1	A1a3a2	1
17014	17014G>T	G17014T	1	A2a8	0	-	1
17059	17059C>A	C17059A	1	B1a1	0	-	1
17075	17075T>A	T17075A	1	A2a2c	0	-	1
17104	17104C>T	C17104T	2	A2a5c;B	0	-	2
17118	17118C>T	C17118T	1	A2a4	0	-	1
17122	17122G>A	G17122A	1	B	0	-	1
17125	17125C>A	C17125A	1	A2a5	0	-	1
17126	17126T>C	T17126C	1	A2a5	0	-	1
17193	17193G>T	G17193T	2	A2a;A2a2a	0	-	2
17215	17215A>G	A17215G	1	A2a1	0	-	1
17247	17247T>C	T17247C	2	A1;A1a1	1	A1a2	3
17278	17278G>T	G17278T	1	A2a15a	0	-	1
17285	17285C>T	C17285T	1	A2a	0	-	1
17304	17304C>T	C17304T	2	A2a2a;B1a1	0	-	2
17326	17326C>T	C17326T	1	B1a1	0	-	1
17338	17338G>T	G17338T	1	A1a3a	0	-	1
17339	17339C>T	C17339T	1	A2a2a	0	-	1
17372	17372C>T	C17372T	1	B	0	-	1
17373	17373C>T	C17373T	0	-	1	A10	1
17375	17375C>T	C17375T	1	A2a5b	0	-	1
17376	17376A>G	A17376G	1	A1	0	-	1
17403	17403C>T	C17403T	1	B1a1e	0	-	1
17410	17410C>T	C17410T	2	A;A2a	0	-	2
17418	17418G>C	G17418C	1	A2a	0	-	1
17423	17423A>G	A17423G	1	A9	0	-	1
17430	17430C>T	C17430T	2	A2a2b2a;B1a1b1	0	-	2
17457	17457A>G	A17457G	1	A2a2a	0	-	1
17470	17470C>T	C17470T	1	B9	0	-	1
17474	17474C>T	C17474T	1	B1a1	0	-	1
17502	17502C>T	C17502T	1	A3a1a	0	-	1
17518	17518C>T	C17518T	1	A2a2a	0	-	1
17531	17531T>C	T17531C	1	B1a1b1	0	-	1
17562	17562G>T	G17562T	1	A2a2a	0	-	1
17569	17569C>T	C17569T	1	B9	0	-	1
17596	17596G>A	G17596A	1	A1	0	-	1
17615	17615A>G	A17615G	1	A2a2a	0	-	1
17639	17639C>T	C17639T	2	A2a2a;A2a5	0	-	2
17656	17656A>G	A17656G	1	A1a3a	0	-	1
17659	17659T>G	T17659G	1	A3a	0	-	1
17664	17664T>C	T17664C	1	A2a5c	0	-	1
17673	17673T>C	T17673C	1	B1a	0	-	1
17676	17676C>T	C17676T	1	A2a8	0	-	1
17679	17679G>T	G17679T	1	A2a2a	0	-	1
17688	17688T>C	T17688C	1	A2a4	0	-	1
17690	17690C>T	C17690T	1	A2a2b1	0	-	1
17722	17722G>A	G17722A	1	A2a3	0	-	1
17733	17733C>T	C17733T	1	B1a1a	0	-	1
17746	17746C>T	C17746T	1	A2a2a	0	-	1
17747	17747C>T	C17747T	1	A1a2a1	1	B1a1	2
17762	17762C>T	C17762T	1	A2a9	0	-	1
17766	17766C>T	C17766T	1	A2a2a	0	-	1
17799	17799A>G	A17799G	3	A;A1a2a;A1a2a1	0	-	3
17835	17835T>C	T17835C	1	A2a	0	-	1
17858	17858A>G	A17858G	0	-	1	B1a	1
17859	17859T>C	T17859C	0	-	1	A1a2b	1
17877	17877T>C	T17877C	1	B4b	0	-	1
17884	17884A>G	A17884G	1	B1a1	0	-	1
17944	17944G>T	G17944T	2	A1a4a;A2a	0	-	2
17964	17964G>A	G17964A	1	A2a15	0	-	1
17985	17985C>T	C17985T	1	A2a2a	0	-	1
17993	17993A>G	A17993G	1	A2a4	0	-	1
18029	18029C>T	C18029T	2	A2a2a;A2a4	0	-	2
18060	18060C>T	C18060T	2	A2a2a;A3	1	B1	3
18086	18086C>T	C18086T	1	A1a7	0	-	1
18099	18099T>C	T18099C	1	A2a	0	-	1
18099	18099T>A	T18099A	1	B1a1	0	-	1
18115	18115C>T	C18115T	1	A2a2a15	0	-	1
18121	18121A>G	A18121G	1	B1a1	0	-	1
18126	18126T>C	T18126C	1	A2a4	0	-	1
18149	18149G>T	G18149T	1	B1a1	0	-	1
18171	18171C>A	C18171A	1	A2a2a11	0	-	1
18180	18180G>A	G18180A	1	B9	0	-	1
18212	18212T>A	T18212A	1	A2a2a	0	-	1
18214	18214G>T	G18214T	1	A2a1	0	-	1
18255	18255G>T	G18255T	1	A1a3a	0	-	1
18261	18261C>T	C18261T	1	A2a2a	0	-	1
18266	18266G>T	G18266T	1	A2a4	0	-	1
18312	18312C>T	C18312T	2	A2a3e;A4a	0	-	2
18318	18318G>T	G18318T	1	A2a14	0	-	1
18348	18348C>T	C18348T	2	A2a;A2a2b	0	-	2
18381	18381T>C	T18381C	1	A2a2b	0	-	1
18401	18401C>T	C18401T	1	B1a1f	0	-	1
18433	18433G>A	G18433A	1	A2a2a	0	-	1
18457	18457C>T	C18457T	2	A1a2;A2a2a	0	-	2
18481	18481C>T	C18481T	1	A2a2c	0	-	1
18488	18488T>C	T18488C	2	A2a1;B	0	-	2
18501	18501C>T	C18501T	1	A1a	0	-	1
18568	18568C>T	C18568T	2	A;B1a1	0	-	2
18570	18570C>T	C18570T	1	A2a3	0	-	1
18582	18582C>T	C18582T	1	B3a	0	-	1
18583	18583G>T	G18583T	1	A2a2a5	0	-	1
18589	18589G>T	G18589T	1	A2a4	0	-	1
18603	18603T>C	T18603C	3	A2a5a;B2;B4a	0	-	3
18656	18656C>T	C18656T	2	A2a2a;A2a3g	1	A3c1	3
18662	18662G>T	G18662T	1	B3a	0	-	1
18680	18680C>T	C18680T	1	A3b	0	-	1
18682	18682A>G	A18682G	1	A2a2a	0	-	1
18683	18683C>T	C18683T	1	B1a1	0	-	1
18702	18702A>T	A18702T	1	A2a2a	0	-	1
18713	18713C>T	C18713T	0	-	1	A2a4g	1
18723	18723T>C	T18723C	1	A	0	-	1
18736	18736T>C	T18736C	2	B5a1;B5a1a	0	-	2
18744	18744C>T	C18744T	1	A2a2a4a	0	-	1
18756	18756G>A	G18756A	1	A2a4a2	0	-	1
18756	18756G>T	G18756T	2	B1a1;B1a1b1	0	-	2
18765	18765T>C	T18765C	1	A11	0	-	1
18771	18771T>C	T18771C	1	A1a	0	-	1
18788	18788C>T	C18788T	2	A2a4;A2a4b	0	-	2
18789	18789A>C	A18789C	1	A	0	-	1
18814	18814C>T	C18814T	1	A2a	0	-	1
18828	18828C>T	C18828T	2	A;A2a3	0	-	2
18834	18834T>C	T18834C	1	A1a	0	-	1
18863	18863T>C	T18863C	1	B1a1b	0	-	1
18873	18873G>T	G18873T	1	A1a4	0	-	1
18877	18877C>T	C18877T	1	B1a1	1	A2a2b	2
18888	18888C>T	C18888T	1	A	0	-	1
18894	18894C>T	C18894T	1	B1a1	0	-	1
18898	18898G>T	G18898T	1	A2a4	0	-	1
18904	18904C>T	C18904T	1	A2a3a	0	-	1
18907	18907G>T	G18907T	1	B9	0	-	1
18928	18928C>T	C18928T	3	A2a2a;A3a1;A3a1a5	0	-	3
18972	18972G>T	G18972T	1	A2a3c	0	-	1
18975	18975T>A	T18975A	1	B2	0	-	1
18981	18981C>T	C18981T	1	A2a2c	0	-	1
18981	18981C>G	C18981G	1	A2a3a	0	-	1
18985	18985G>T	G18985T	1	A1a5	0	-	1
18996	18996T>C	T18996C	1	B	0	-	1
18998	18998C>T	C18998T	0	-	1	A2a2a4a	1
19017	19017C>T	C19017T	1	A2a5	0	-	1
19027	19027C>T	C19027T	1	A1a3a2	0	-	1
19032	19032C>T	C19032T	1	A2a3c	0	-	1
19071	19071T>A	T19071A	1	A2a2a9	0	-	1
19101	19101G>T	G19101T	1	A2a4d	0	-	1
19102	19102C>T	C19102T	1	A2a2b1	0	-	1
19113	19113C>T	C19113T	1	A4	0	-	1
19137	19137A>T	A19137T	1	A1a	0	-	1
19137	19137A>G	A19137G	1	B1a1	0	-	1
19170	19170C>T	C19170T	0	-	1	A2a4i	1
19175	19175A>C	A19175C	1	B2	0	-	1
19186	19186C>T	C19186T	1	A1a3a	0	-	1
19190	19190T>A	T19190A	1	B5	0	-	1
19273	19273C>T	C19273T	1	A1a	0	-	1
19299	19299T>G	T19299G	1	A2a4a	0	-	1
19343	19343C>T	C19343T	1	A2a4d	0	-	1
19366	19366C>T	C19366T	1	A2a2a9	0	-	1
19386	19386C>T	C19386T	1	A	0	-	1
19391	19391C>T	C19391T	1	A2a4a2	0	-	1
19398	19398G>T	G19398T	1	A2a2c1a	0	-	1
19402	19402C>T	C19402T	1	A2a2	0	-	1
19484	19484C>T	C19484T	1	A3a1a	0	-	1
19492	19492A>G	A19492G	1	A2a4	0	-	1
19509	19509G>A	G19509A	0	-	1	A2a4i	1
19518	19518G>T	G19518T	2	A2a4d;A3a1a	0	-	2
19524	19524C>T	C19524T	2	A2a;A3b	0	-	2
19525	19525G>A	G19525A	1	A2a2a4a	0	-	1
19525	19525G>T	G19525T	1	A2a4k	0	-	1
19536	19536C>T	C19536T	1	A1a3a	0	-	1
19547	19547C>T	C19547T	1	A3a1a4	0	-	1
19559	19559G>T	G19559T	1	A2a2c	0	-	1
19602	19602C>T	C19602T	1	A2a3	0	-	1
19610	19610C>T	C19610T	1	A10	0	-	1
19621	19621A>T	A19621T	1	A2a2c	0	-	1
19645	19645G>T	G19645T	1	B1a1	0	-	1
19646	19646T>C	T19646C	1	A1a2	0	-	1
19652	19652A>G	A19652G	1	A2a5	0	-	1
19677	19677G>T	G19677T	1	A2a4	0	-	1
19684	19684G>T	G19684T	2	A2a3;B5a1a	0	-	2
19705	19705A>G	A19705G	1	A	0	-	1
19713	19713T>C	T19713C	1	B5a1	0	-	1
19718	19718C>T	C19718T	1	A2a4c1	0	-	1
19719	19719A>T	A19719T	1	B9	0	-	1
19763	19763C>T	C19763T	1	A1a3a	0	-	1
19788	19788G>T	G19788T	1	A3a1a2	0	-	1
19818	19818A>G	A19818G	1	A3a1a3	0	-	1
19839	19839T>C	T19839C	0	-	1	A2a4b	1
19862	19862C>T	C19862T	2	A3a1;A3a1a	0	-	2
19872	19872G>T	G19872T	1	A2a3f	0	-	1
19884	19884C>T	C19884T	1	A2a2c	0	-	1
19895	19895C>T	C19895T	1	A1a3a	0	-	1
19945	19945A>G	A19945G	1	A	0	-	1
19959	19959A>C	A19959C	1	A	0	-	1
19959	19959A>G	A19959G	1	B8	0	-	1
19961	19961C>T	C19961T	1	B1a1	0	-	1
19974	19974A>G	A19974G	1	A3a1	0	-	1
20005	20005G>A	G20005A	1	A2a2a7	0	-	1
20031	20031C>A	C20031A	1	A2a4a	0	-	1
20031	20031C>T	C20031T	1	A2a12a	0	-	1
20047	20047A>G	A20047G	2	A3a1;A3a1a	0	-	2
20051	20051C>T	C20051T	1	A2a	0	-	1
20059	20059A>T	A20059T	1	A3a1a1	0	-	1
20128	20128G>A	G20128A	1	B1a1e	0	-	1
20132	20132C>T	C20132T	2	A2a4;B1a1	0	-	2
20133	20133C>T	C20133T	1	A2a	0	-	1
20134	20134G>A	G20134A	1	A2a2a	0	-	1
20148	20148C>T	C20148T	3	A2a4;A2a7;B1a1	0	-	3
20167	20167G>T	G20167T	1	B1a1f	0	-	1
20178	20178C>T	C20178T	2	A2a3;A2a4d	0	-	2
20234	20234C>T	C20234T	1	A2a2c	0	-	1
20235	20235C>A	C20235A	1	A3a1a	0	-	1
20268	20268A>G	A20268G	0	-	1	A2a5	1
20270	20270C>T	C20270T	2	A;A3	0	-	2
20275	20275G>A	G20275A	1	A2a	0	-	1
20275	20275G>T	G20275T	1	A2a4d	0	-	1
20276	20276A>G	A20276G	1	A2a1	0	-	1
20281	20281T>C	T20281C	1	B1a1	0	-	1
20288	20288A>G	A20288G	1	A1a1	0	-	1
20295	20295T>C	T20295C	1	A2a3	0	-	1
20316	20316C>T	C20316T	1	B4b	0	-	1
20325	20325C>T	C20325T	1	A2a	0	-	1
20326	20326G>A	G20326A	1	B1a1	0	-	1
20335	20335G>A	G20335A	1	A12	0	-	1
20355	20355A>G	A20355G	1	A2a1a	0	-	1
20367	20367T>C	T20367C	1	B2	0	-	1
20383	20383G>T	G20383T	1	A8	0	-	1
20397	20397G>A	G20397A	1	A2a	0	-	1
20398	20398G>A	G20398A	2	A2a1;A2a7	0	-	2
20402	20402C>T	C20402T	1	A1a3a	0	-	1
20419	20419G>T	G20419T	1	A2a2a	0	-	1
20429	20429C>T	C20429T	1	A1a3a	0	-	1
20434	20434G>T	G20434T	1	A2a9	0	-	1
20483	20483C>T	C20483T	1	A2a2	0	-	1
20527	20527G>T	G20527T	1	B	0	-	1
20555	20555C>T	C20555T	1	B1a1	0	-	1
20578	20578G>T	G20578T	1	A2a2c	1	A2a2c1	2
20580	20580G>T	G20580T	1	B1a1g	0	-	1
20582	20582C>T	C20582T	1	B3a	0	-	1
20663	20663G>A	G20663A	1	A1a3a2	0	-	1
20670	20670G>A	G20670A	1	A	0	-	1
20676	20676A>G	A20676G	1	A2a2a	0	-	1
20679	20679G>A	G20679A	1	A	0	-	1
20692	20692C>T	C20692T	1	A	0	-	1
20698	20698C>T	C20698T	1	A2a4	0	-	1
20709	20709G>T	G20709T	1	A3	0	-	1
20736	20736C>T	C20736T	2	A1a5;A2a2a	0	-	2
20752	20752G>T	G20752T	1	A2a2a	0	-	1
20755	20755A>C	A20755C	0	-	1	A2a2a12	1
20762	20762C>T	C20762T	1	A3c1	0	-	1
20766	20766A>G	A20766G	1	A2a2a	0	-	1
20773	20773G>A	G20773A	1	B1a1b	0	-	1
20787	20787T>C	T20787C	1	A3a1a	0	-	1
20790	20790C>T	C20790T	1	A1a3a	0	-	1
20801	20801C>T	C20801T	1	B3a	0	-	1
20825	20825C>A	C20825A	1	A3a1a1	0	-	1
20841	20841A>G	A20841G	1	A2a2b	0	-	1
20844	20844C>T	C20844T	1	A2a2a	0	-	1
20844	20844C>A	C20844A	1	A2a3	0	-	1
20852	20852T>A	T20852A	1	B	0	-	1
20887	20887G>A	G20887A	2	A1a;A3a1a	0	-	2
20923	20923T>C	T20923C	1	A2a4c1	0	-	1
20931	20931G>T	G20931T	1	A2a2a8	0	-	1
20937	20937G>T	G20937T	1	A1a	0	-	1
20991	20991G>A	G20991A	1	B1a1	0	-	1
20995	20995G>T	G20995T	1	A2a1a	0	-	1
21034	21034C>T	C21034T	1	A3b	0	-	1
21072	21072T>C	T21072C	1	A1a3a	0	-	1
21110	21110C>T	C21110T	1	A2a4	0	-	1
21111	21111T>G	T21111G	1	A	0	-	1
21123	21123G>T	G21123T	2	A2a3;A3b	0	-	2
21137	21137A>G	A21137G	6	A;A1a3;A1a7;A2a;A2a5;A9a	0	-	6
21139	21139C>T	C21139T	1	A2a4d	0	-	1
21142	21142G>T	G21142T	1	B5	0	-	1
21147	21147T>C	T21147C	1	B1a1	0	-	1
21158	21158T>C	T21158C	1	B1a1f	0	-	1
21190	21190G>A	G21190A	1	A2a5	0	-	1
21220	21220G>A	G21220A	1	A2a2a	0	-	1
21255	21255G>A	G21255A	1	A1a3a3	0	-	1
21255	21255G>C	G21255C	1	B1a1	0	-	1
21263	21263C>T	C21263T	1	A2a	0	-	1
21267	21267A>G	A21267G	1	A3b	0	-	1
21282	21282A>G	A21282G	1	A3	0	-	1
21302	21302C>T	C21302T	1	A2a2a	0	-	1
21306	21306C>T	C21306T	1	A	0	-	1
21316	21316G>A	G21316A	1	A	0	-	1
21319	21319G>A	G21319A	1	A3a1a4	0	-	1
21352	21352A>G	A21352G	1	B	0	-	1
21380	21380C>T	C21380T	1	B1a1	0	-	1
21386	21386C>T	C21386T	1	B1a1	0	-	1
21411	21411C>T	C21411T	1	A1a3a	0	-	1
21431	21431C>T	C21431T	1	A2a	0	-	1
21462	21462T>C	T21462C	1	A1a2	0	-	1
21467	21467T>C	T21467C	1	A2a	0	-	1
21512	21512A>G	A21512G	1	B4a	0	-	1
21524	21524T>G	T21524G	1	A1	0	-	1
21538	21538G>T	G21538T	2	A2a4c1;A2a14	0	-	2
21552	21552C>T	C21552T	1	A2a3	0	-	1
21575	21575C>T	C21575T	11	A1;A1a2d;A1a3a2;A2a2;A2a2a;A2a2b1;A2a3;A2a8;A3c;A4a1;B1a1d	0	-	11
21584	21584T>G	T21584G	2	A1;A1a	1	A1b1	3
21585	21585T>G	T21585G	1	A2a2a1b	0	-	1
21590	21590C>T	C21590T	1	A2a2a1a	0	-	1
21595	21595C>T	C21595T	2	A2a;A2a2c	0	-	2
21597	21597C>T	C21597T	1	A2a2a2	0	-	1
21614	21614C>T	C21614T	2	A2a;B1a1b	0	-	2
21622	21622C>T	C21622T	3	A2a;A2a3;A4	0	-	3
21624	21624G>T	G21624T	1	A2a4	0	-	1
21625	21625A>G	A21625G	1	A1a2a	0	-	1
21627	21627C>T	C21627T	1	A3a1a	0	-	1
21642	21642C>T	C21642T	1	B1a1b	0	-	1
21644	21644T>C	T21644C	1	A8	0	-	1
21646	21646C>T	C21646T	2	A2a4c1;B1a1d	0	-	2
21648	21648C>T	C21648T	2	A2a2a;B5a1a	0	-	2
21651	21651A>G	A21651G	1	A2a4	0	-	1
21656	21656T>A	T21656A	1	A	0	-	1
21658	21658C>T	C21658T	1	A3a1a	0	-	1
21676	21676C>T	C21676T	2	A2a;A2a4k	0	-	2
21686	21686G>C	G21686C	1	A2	0	-	1
21691	21691C>T	C21691T	1	B3a	0	-	1
21697	21697C>T	C21697T	1	B3a	0	-	1
21707	21707C>T	C21707T	0	-	1	A6	1
21711	21711C>T	C21711T	2	A;A2a2a	0	-	2
21721	21721C>T	C21721T	1	A2a8	0	-	1
21724	21724G>C	G21724C	1	A2a2a9	0	-	1
21724	21724G>T	G21724T	2	A2a3g;A2a4	0	-	2
21742	21742C>T	C21742T	1	A2a3a	0	-	1
21745	21745T>C	T21745C	1	A1a2	0	-	1
21767	21767C>G	C21767G	1	A5	0	-	1
21774	21774C>T	C21774T	1	B1a1	0	-	1
21776	21776G>T	G21776T	1	A5	0	-	1
21781	21781C>T	C21781T	1	A2a2a	0	-	1
21782	21782A>C	A21782C	1	A5	0	-	1
21786	21786G>A	G21786A	1	A2a	0	-	1
21789	21789C>T	C21789T	2	A1a3a;A3b	0	-	2
21793	21793G>T	G21793T	1	A2a3	0	-	1
21795	21795G>A	G21795A	1	A1a2a1	0	-	1
21830	21830G>T	G21830T	2	A2a2a4a;A2a9	0	-	2
21843	21843C>T	C21843T	1	A2a15a	0	-	1
21850	21850G>T	G21850T	1	B1a1	0	-	1
21853	21853G>A	G21853A	1	A1	0	-	1
21855	21855C>T	C21855T	1	B	0	-	1
21859	21859C>T	C21859T	1	A1	0	-	1
21910	21910C>T	C21910T	1	B5a1	0	-	1
21911	21911C>T	C21911T	1	B1a1	0	-	1
21917	21917A>G	A21917G	1	A3	0	-	1
21920	21920G>A	G21920A	1	A2a2a	0	-	1
21974	21974G>T	G21974T	1	A1b1	0	-	1
21974	21974G>C	G21974C	1	A2a2a	0	-	1
21980	21980T>G	T21980G	1	A2a2a14	0	-	1
21995	21995T>C	T21995C	1	A2a2a	0	-	1
21997	21997C>A	C21997A	1	B	0	-	1
21998	21998C>T	C21998T	1	A2a2a	0	-	1
21999	21999A>G	A21999G	1	A2a	0	-	1
22000	22000C>T	C22000T	1	A2a2a	0	-	1
22009	22009C>T	C22009T	1	A2a4a	0	-	1
22030	22030G>T	G22030T	1	A2a2c	0	-	1
22032	22032T>C	T22032C	1	A3a1a	0	-	1
22042	22042T>C	T22042C	1	A3a1a	0	-	1
22081	22081G>A	G22081A	1	A	0	-	1
22088	22088C>T	C22088T	1	A1a3a	0	-	1
22104	22104G>T	G22104T	1	A3	0	-	1
22120	22120C>T	C22120T	1	A2a15a	0	-	1
22144	22144T>C	T22144C	1	A1a3a	0	-	1
22151	22151A>G	A22151G	1	B3a	0	-	1
22168	22168A>C	A22168C	1	A2a4d	0	-	1
22180	22180G>A	G22180A	1	A2a4b	0	-	1
22199	22199G>T	G22199T	1	A2a4	0	-	1
22203	22203G>T	G22203T	1	A2a2a	0	-	1
22205	22205G>C	G22205C	2	A;A4b	0	-	2
22207	22207T>C	T22207C	1	B1a1b	0	-	1
22213	22213T>C	T22213C	1	A3a1a	0	-	1
22224	22224C>T	C22224T	2	A2a2a14;A2a4d	0	-	2
22234	22234A>G	A22234G	1	A2a2	0	-	1
22277	22277C>A	C22277A	1	A2a4	1	A2a4a5	2
22303	22303T>G	T22303G	1	A	0	-	1
22309	22309G>T	G22309T	1	A	0	-	1
22323	22323C>T	C22323T	3	A;A1a2;A4	0	-	3
22324	22324T>C	T22324C	1	A2a4a3a	0	-	1
22326	22326C>T	C22326T	1	A2a4	0	-	1
22333	22333T>C	T22333C	1	A1	0	-	1
22335	22335G>T	G22335T	2	A2a2a;A3b	0	-	2
22345	22345T>C	T22345C	1	A2a	0	-	1
22346	22346G>A	G22346A	1	A2a	0	-	1
22351	22351A>T	A22351T	2	A2a;A2a3	0	-	2
22363	22363G>T	G22363T	1	A2a	0	-	1
22391	22391T>C	T22391C	1	A	0	-	1
22404	22404A>T	A22404T	1	A2a3	0	-	1
22427	22427G>A	G22427A	1	A2a4	0	-	1
22429	22429A>G	A22429G	1	A1	0	-	1
22432	22432C>T	C22432T	1	B1a1	0	-	1
22444	22444C>T	C22444T	2	A2a2a4a;A2a2c	0	-	2
22455	22455A>G	A22455G	1	A2a2a12	0	-	1
22468	22468G>T	G22468T	3	A2a2a4a;A2a2a9;B4a	0	-	3
22474	22474A>G	A22474G	1	A1	0	-	1
22480	22480C>T	C22480T	1	B1a1b	0	-	1
22484	22484G>T	G22484T	1	A2a2a	0	-	1
22492	22492A>G	A22492G	1	A2a2b	0	-	1
22515	22515T>C	T22515C	1	A2a4	0	-	1
22524	22524A>T	A22524T	1	A2a2a	0	-	1
22583	22583G>A	G22583A	1	A2a	0	-	1
22592	22592G>T	G22592T	1	B1a1	0	-	1
22606	22606A>T	A22606T	0	-	1	B4a1	1
22622	22622A>G	A22622G	1	A	0	-	1
22652	22652G>T	G22652T	1	A	0	-	1
22661	22661G>T	G22661T	2	A1;B5	0	-	2
22695	22695A>G	A22695G	1	A	0	-	1
22787	22787C>G	C22787G	1	A1	0	-	1
22798	22798A>G	A22798G	1	A2a2a	0	-	1
22865	22865G>T	G22865T	1	A2a	0	-	1
22875	22875C>T	C22875T	1	A2a17	0	-	1
22896	22896T>C	T22896C	1	A1a3a1	0	-	1
22918	22918G>T	G22918T	1	A2a3	0	-	1
22935	22935A>G	A22935G	1	A2a2a	0	-	1
22936	22936G>T	G22936T	1	A	0	-	1
22962	22962A>T	A22962T	1	A2a	0	-	1
22964	22964A>T	A22964T	1	A2a	0	-	1
22965	22965T>C	T22965C	1	A1a3a	0	-	1
22976	22976A>G	A22976G	1	A2a2a	0	-	1
22984	22984G>A	G22984A	1	B1a1e	0	-	1
22988	22988G>A	G22988A	1	A2a4c	1	B1a1d	2
22991	22991A>G	A22991G	1	A4	0	-	1
23003	23003A>C	A23003C	1	A1a2	0	-	1
23010	23010T>C	T23010C	0	-	1	B1a1c	1
23029	23029C>T	C23029T	1	A2a2a	0	-	1
23032	23032T>C	T23032C	1	A2a2a4a	0	-	1
23034	23034C>G	C23034G	1	A1a3a1	0	-	1
23084	23084T>C	T23084C	1	A1a	0	-	1
23086	23086C>T	C23086T	1	A2a4a	0	-	1
23088	23088G>A	G23088A	1	A1	0	-	1
23090	23090G>T	G23090T	1	A1	0	-	1
23108	23108G>C	G23108C	1	A2a2a1a	0	-	1
23116	23116A>T	A23116T	3	A2a4;A2a4a1;A2a7	0	-	3
23118	23118A>C	A23118C	1	A2a2a	0	-	1
23119	23119T>A	T23119A	1	B1a1h	0	-	1
23120	23120G>T	G23120T	1	B1a1	0	-	1
23122	23122A>T	A23122T	1	A1a3a1	0	-	1
23182	23182T>C	T23182C	1	A1a	0	-	1
23185	23185C>T	C23185T	2	A2a2a;B1a1	0	-	2
23202	23202C>T	C23202T	1	B1a1	0	-	1
23206	23206C>T	C23206T	1	A2a3	0	-	1
23236	23236G>T	G23236T	1	A12	0	-	1
23242	23242G>T	G23242T	1	B1a1	0	-	1
23244	23244C>T	C23244T	1	A1a2	0	-	1
23248	23248C>T	C23248T	1	A2a4	0	-	1
23335	23335T>A	T23335A	1	A1a2a1	0	-	1
23347	23347C>T	C23347T	1	B2	0	-	1
23359	23359A>G	A23359G	1	A	0	-	1
23393	23393C>T	C23393T	1	A2a	0	-	1
23401	23401G>T	G23401T	1	A2a3	0	-	1
23403	23403A>G	A23403G	1	B	1	A2	2
23405	23405G>C	G23405C	1	B	0	-	1
23416	23416A>T	A23416T	1	A2a2a	0	-	1
23422	23422C>T	C23422T	1	A	0	-	1
23423	23423C>T	C23423T	1	A2a2a	0	-	1
23430	23430C>T	C23430T	1	B1a1	0	-	1
23439	23439C>T	C23439T	1	A2a2a8	0	-	1
23453	23453C>T	C23453T	1	A2a2a	0	-	1
23520	23520C>T	C23520T	1	A2a2a	0	-	1
23522	23522G>C	G23522C	1	A1a	0	-	1
23525	23525C>T	C23525T	2	B1a1g;B4a1	0	-	2
23533	23533C>T	C23533T	2	A;A1a3a	0	-	2
23536	23536C>T	C23536T	1	A2a2a	0	-	1
23557	23557C>T	C23557T	1	A2a3	0	-	1
23569	23569T>C	T23569C	1	A	0	-	1
23575	23575C>T	C23575T	0	-	1	A2a15	1
23586	23586A>G	A23586G	1	B3a	0	-	1
23587	23587G>T	G23587T	1	A2a4	0	-	1
23587	23587G>C	G23587C	0	-	1	A2a15a	1
23593	23593G>T	G23593T	2	A1a3a3;A2a2a9	0	-	2
23593	23593G>A	G23593A	1	A2a2a	0	-	1
23597	23597A>T	A23597T	1	A2a2a	0	-	1
23600	23600T>C	T23600C	1	A2a2a	0	-	1
23605	23605T>G	T23605G	1	B	0	-	1
23607	23607G>A	G23607A	1	A1	0	-	1
23611	23611G>A	G23611A	1	A2a2c	0	-	1
23625	23625C>T	C23625T	1	A3a	0	-	1
23628	23628G>T	G23628T	1	A2a3	0	-	1
23635	23635C>T	C23635T	1	A2a4a5	0	-	1
23670	23670A>G	A23670G	1	A12	0	-	1
23673	23673C>T	C23673T	1	A2a2a	0	-	1
23679	23679C>T	C23679T	0	-	1	A2a2a13a	1
23707	23707C>T	C23707T	1	A2a2a15	1	A1a5	2
23717	23717A>G	A23717G	1	A1b	0	-	1
23720	23720A>G	A23720G	1	A2a3	0	-	1
23731	23731C>T	C23731T	0	-	1	A2a4c	1
23755	23755G>C	G23755C	1	A1a3a1	0	-	1
23758	23758C>T	C23758T	1	B1a1	0	-	1
23767	23767A>T	A23767T	1	A4	0	-	1
23816	23816C>T	C23816T	1	B	0	-	1
23856	23856G>T	G23856T	2	A2a4;A3	0	-	2
23857	23857T>C	T23857C	1	B5	0	-	1
23868	23868G>T	G23868T	1	A2a4b	0	-	1
23876	23876G>C	G23876C	1	A2a4a	0	-	1
23893	23893C>T	C23893T	1	A2a2a7	0	-	1
23900	23900G>C	G23900C	1	B2	0	-	1
23926	23926T>C	T23926C	1	A1a2	0	-	1
23929	23929C>T	C23929T	1	A2a2a1b	1	A3b	2
23934	23934C>T	C23934T	1	A3b	1	A3a1a4	2
23947	23947A>G	A23947G	2	A2a5;A2a16	0	-	2
23952	23952T>G	T23952G	1	A1	0	-	1
23984	23984G>A	G23984A	1	A1a3	0	-	1
23986	23986T>C	T23986C	1	B2	0	-	1
23987	23987C>T	C23987T	1	A1a2a1	0	-	1
23996	23996C>T	C23996T	1	A4b	0	-	1
24022	24022T>C	T24022C	1	A2a4	0	-	1
24023	24023C>T	C24023T	1	A1a2	0	-	1
24023	24023C>A	C24023A	1	A2a3	0	-	1
24034	24034C>T	C24034T	3	A;A2a4f;A9	1	B5	4
24054	24054C>T	C24054T	0	-	1	A2a4a3a	1
24063	24063T>C	T24063C	1	A2a5a	0	-	1
24077	24077G>T	G24077T	0	-	1	A2a6	1
24095	24095G>T	G24095T	3	A1a3;A1a3a;A2a4	0	-	3
24096	24096C>T	C24096T	1	A2a3	0	-	1
24099	24099C>T	C24099T	2	A2a2a5;A2a4b	0	-	2
24117	24117C>T	C24117T	1	A2a	0	-	1
24121	24121A>G	A24121G	1	A2a5b	0	-	1
24130	24130C>T	C24130T	1	A8	0	-	1
24133	24133C>T	C24133T	1	A1a2	0	-	1
24164	24164G>A	G24164A	1	A	0	-	1
24193	24193G>T	G24193T	1	A2a5a	0	-	1
24197	24197G>T	G24197T	0	-	1	A2a2b2a	1
24223	24223C>T	C24223T	1	B5	0	-	1
24227	24227G>A	G24227A	1	A3a1a5	0	-	1
24232	24232A>C	A24232C	1	B1a1b	0	-	1
24236	24236G>T	G24236T	1	A1a	0	-	1
24240	24240C>T	C24240T	1	A2a5	0	-	1
24310	24310C>T	C24310T	1	A2a5	0	-	1
24325	24325A>G	A24325G	1	A	0	-	1
24332	24332G>T	G24332T	1	A2a2a	0	-	1
24348	24348G>T	G24348T	1	A2a2a2	0	-	1
24351	24351C>T	C24351T	1	B	0	-	1
24364	24364T>G	T24364G	1	A	0	-	1
24367	24367A>C	A24367C	1	A2a5	0	-	1
24368	24368G>C	G24368C	1	A	0	-	1
24368	24368G>T	G24368T	2	A1a2;A2a2a3	1	A2a2a5	3
24370	24370C>T	C24370T	3	A;B;B4a	0	-	3
24372	24372C>T	C24372T	1	A3	0	-	1
24378	24378C>T	C24378T	3	A2a2a9;A2a2c;A2a12a	0	-	3
24380	24380T>A	T24380A	1	A2a4a	0	-	1
24381	24381C>T	C24381T	2	A2a2;A3a1	0	-	2
24383	24383A>G	A24383G	1	A2a4a	0	-	1
24389	G24389CA>C	AG24389CC	0	-	1	A2a11	1
24390	24390G>C	G24390C	1	A2a7	0	-	1
24405	24405T>G	T24405G	1	A8	0	-	1
24422	24422C>A	C24422A	1	A2a5	0	-	1
24436	24436T>C	T24436C	2	A1a3a;A3	0	-	2
24471	24471T>C	T24471C	1	B5	0	-	1
24520	24520A>G	A24520G	1	A2a2a	0	-	1
24586	24586G>T	G24586T	1	A2a4b	0	-	1
24680	24680G>T	G24680T	1	A	0	-	1
24685	24685T>C	T24685C	1	A4a	0	-	1
24694	24694A>T	A24694T	0	-	1	B1a1b	1
24734	24734C>T	C24734T	1	A1a3a1	0	-	1
24739	24739T>C	T24739C	1	A2a1	0	-	1
24751	24751G>T	G24751T	1	A2a	0	-	1
24794	24794G>T	G24794T	2	A2a2a;A2a4	0	-	2
24797	24797C>T	C24797T	1	A2a2a	0	-	1
24797	24797C>A	C24797A	1	A3c1	0	-	1
24812	24812G>T	G24812T	2	A;A3a1a	0	-	2
24819	24819A>G	A24819G	1	A3	0	-	1
24844	24844C>T	C24844T	1	A2a2a	0	-	1
24862	24862A>G	A24862G	0	-	1	A2a12	1
24877	24877A>G	A24877G	1	B1a1	0	-	1
24904	24904C>T	C24904T	1	A3a1a1	0	-	1
24912	24912C>T	C24912T	1	A2a9	0	-	1
24926	24926G>T	G24926T	1	A1a3a	0	-	1
24928	24928G>T	G24928T	1	B3a	0	-	1
24956	24956A>G	A24956G	1	A2a2	0	-	1
24959	24959G>T	G24959T	1	A2a15	0	-	1
24982	24982T>C	T24982C	1	A2a2a9	0	-	1
24990	24990C>T	C24990T	2	A2a3;B4a	0	-	2
25000	25000C>T	C25000T	1	A3	0	-	1
25006	25006C>T	C25006T	1	A	0	-	1
25046	25046C>T	C25046T	1	A1a3a	0	-	1
25047	25047C>T	C25047T	1	A	0	-	1
25048	25048A>T	A25048T	1	A1a3a	0	-	1
25050	25050A>G	A25050G	1	B5a1a	0	-	1
25051	25051T>C	T25051C	1	A4a	0	-	1
25056	25056A>G	A25056G	1	A1a5	0	-	1
25060	25060A>G	A25060G	1	A	0	-	1
25067	25067A>G	A25067G	1	A2a2a	0	-	1
25070	25070T>C	T25070C	1	A1a1	0	-	1
25088	25088G>T	G25088T	1	A2a2a3	0	-	1
25135	25135G>T	G25135T	2	A2a2a13a;A4	0	-	2
25153	25153C>T	C25153T	1	A	0	-	1
25183	25183G>T	G25183T	1	A1a	0	-	1
25187	25187T>C	T25187C	1	A2a4	0	-	1
25207	25207C>T	C25207T	2	A1a3;A3a1a	0	-	2
25209	25209T>C	T25209C	1	A	0	-	1
25214	25214C>T	C25214T	2	A1a2;A3a1a3	0	-	2
25217	25217G>T	G25217T	1	A2a2a	0	-	1
25218	25218G>T	G25218T	1	A2a5c	0	-	1
25244	25244G>T	G25244T	1	A3	0	-	1
25249	25249G>T	G25249T	2	A2a3c;A2a4a	0	-	2
25250	25250G>T	G25250T	1	A2a2a9	0	-	1
25267	25267C>T	C25267T	1	A	0	-	1
25273	25273G>T	G25273T	1	A2a4	0	-	1
25273	25273G>C	G25273C	2	B1a1;B3a	0	-	2
25302	25302G>T	G25302T	2	A1a4;A2a2a	0	-	2
25317	25317C>T	C25317T	1	A1a3a	0	-	1
25323	25323G>T	G25323T	1	A	0	-	1
25337	25337G>C	G25337C	1	B1a1	0	-	1
25340	25340G>A	G25340A	2	A2a2;B1a1b	0	-	2
25350	25350C>T	C25350T	0	-	1	A2a9	1
25356	25356T>C	T25356C	1	B	0	-	1
25414	25414T>C	T25414C	1	A2a2a	0	-	1
25416	25416C>T	C25416T	1	A2a3f	0	-	1
25424	25424G>T	G25424T	1	A2a5a	0	-	1
25429	25429G>T	G25429T	0	-	1	A2a14	1
25433	25433C>T	C25433T	1	A2a3a	1	A2a3g	2
25437	25437G>T	G25437T	1	A1a2c	0	-	1
25449	25449A>G	A25449G	1	A2a4	0	-	1
25468	25468T>C	T25468C	1	B1a	0	-	1
25473	25473T>C	T25473C	2	A2a4;A3b	0	-	2
25476	25476T>C	T25476C	1	A2a2a	0	-	1
25483	25483G>A	G25483A	1	A2a5	0	-	1
25493	25493C>T	C25493T	1	A1a2	0	-	1
25494	25494G>T	G25494T	1	B1a1	0	-	1
25500	25500G>A	G25500A	2	A1;A1b	0	-	2
25500	25500G>T	G25500T	1	B4b	0	-	1
25521	25521C>T	C25521T	1	A2a2a8	0	-	1
25523	25523G>T	G25523T	1	A2a2a	0	-	1
25528	25528C>T	C25528T	1	A2a4	0	-	1
25537	25537G>T	G25537T	1	A2a4	0	-	1
25539	25539C>T	C25539T	2	A;A2a9	0	-	2
25552	25552G>T	G25552T	1	A2a4b	0	-	1
25553	25553C>T	C25553T	2	A2a2a;B3a	0	-	2
25554	25554T>G	T25554G	1	A2a4	0	-	1
25559	25559T>G	T25559G	1	B4a	0	-	1
25563	25563G>T	G25563T	0	-	1	A2a2	1
25572	25572C>T	C25572T	0	-	1	A1a2d	1
25575	25575A>C	A25575C	1	A2a	0	-	1
25587	25587C>T	C25587T	1	B4a	0	-	1
25593	25593G>C	G25593C	1	A4b	0	-	1
25615	25615A>G	A25615G	1	A3b	0	-	1
25618	25618G>A	G25618A	1	A3a1a	0	-	1
25624	25624C>T	C25624T	1	A2a2a9	0	-	1
25644	25644G>T	G25644T	1	A2a4	0	-	1
25645	25645T>C	T25645C	1	A	0	-	1
25652	25652T>A	T25652A	1	B5	0	-	1
25654	25654G>T	G25654T	1	A	0	-	1
25655	25655T>C	T25655C	1	A1a	0	-	1
25658	25658C>T	C25658T	1	A3	0	-	1
25669	25669C>T	C25669T	0	-	1	A4a1	1
25680	25680C>A	C25680A	1	A2a2a	0	-	1
25687	25687G>A	G25687A	1	A2a2c	0	-	1
25688	25688C>T	C25688T	2	A2a2a1a;A2a2a1b	0	-	2
25688	25688C>A	C25688A	0	-	1	A2a2a1	1
25690	25690G>T	G25690T	1	A2a2	0	-	1
25691	25691G>T	G25691T	1	A2a2a	0	-	1
25696	25696G>A	G25696A	1	A2a4	0	-	1
25703	25703C>A	C25703A	1	A2a3g	0	-	1
25710	25710C>T	C25710T	1	A2a3	0	-	1
25724	25724T>C	T25724C	1	B	0	-	1
25725	25725A>G	A25725G	1	B	0	-	1
25728	25728C>T	C25728T	1	A4	0	-	1
25731	25731C>T	C25731T	2	A2a2a;B1a1	0	-	2
25767	25767G>T	G25767T	1	B	0	-	1
25771	25771C>A	C25771A	1	A2a4	0	-	1
25777	25777C>T	C25777T	1	A2a2a15	0	-	1
25785	25785G>T	G25785T	1	A2a2a	0	-	1
25791	25791C>T	C25791T	1	A2a4	0	-	1
25797	25797C>T	C25797T	1	A2a3c	0	-	1
25810	25810C>G	C25810G	1	A8	0	-	1
25822	25822A>G	A25822G	1	A1a3	0	-	1
25850	25850G>A	G25850A	1	B1a1h	0	-	1
25855	25855G>T	G25855T	1	A2a4a	0	-	1
25906	25906G>T	G25906T	2	A2a2a;A2a4f	0	-	2
25909	25909G>T	G25909T	1	A2a2c2	0	-	1
25910	25910A>G	A25910G	1	A2a4	0	-	1
25916	25916C>T	C25916T	3	A2a4;A2a8;A2a14	0	-	3
25919	25919C>T	C25919T	1	A	0	-	1
25947	25947G>T	G25947T	2	A2a4c1;B2	0	-	2
25956	25956T>C	T25956C	1	A2a2c1a	0	-	1
25958	25958A>G	A25958G	0	-	1	A2a4a3	1
25964	25964A>G	A25964G	1	A1	0	-	1
25979	25979G>T	G25979T	0	-	1	B3a	1
25980	25980A>C	A25980C	1	A3a1a1	0	-	1
25993	25993G>A	G25993A	1	A2a	0	-	1
26006	26006G>C	G26006C	1	A1a2a1	0	-	1
26013	26013C>T	C26013T	2	A2a2;A2a8	0	-	2
26022	26022C>T	C26022T	1	A	0	-	1
26029	26029C>A	C26029A	1	A3a1a	0	-	1
26042	26042C>T	C26042T	1	A2a2b1	0	-	1
26058	26058C>T	C26058T	1	A3a1a	0	-	1
26062	26062G>T	G26062T	1	A3	0	-	1
26063	26063G>T	G26063T	1	B1a1	0	-	1
26065	26065G>T	G26065T	1	B1a1	0	-	1
26088	26088C>T	C26088T	0	-	1	B9	1
26094	26094T>C	T26094C	1	A2a	0	-	1
26124	26124C>T	C26124T	1	B4b	0	-	1
26126	26126A>C	A26126C	1	B1a1	0	-	1
26130	26130T>C	T26130C	1	A1a3a	0	-	1
26144	26144G>T	G26144T	0	-	1	A1	1
26150	26150C>T	C26150T	1	A2a4	0	-	1
26152	26152G>A	G26152A	1	A2a5	0	-	1
26167	26167G>T	G26167T	1	B	0	-	1
26185	26185G>T	G26185T	1	A2a3	0	-	1
26198	26198C>T	C26198T	1	A	0	-	1
26199	26199G>T	G26199T	1	A2a2a	0	-	1
26211	26211G>T	G26211T	2	A6;B4b	0	-	2
26233	26233G>T	G26233T	1	A2a2c	0	-	1
26256	26256C>T	C26256T	1	A2a4a	0	-	1
26262	26262G>A	G26262A	1	A2a2a	0	-	1
26301	26301T>G	T26301G	1	A2a5	0	-	1
26313	26313C>T	C26313T	1	A2a3g	0	-	1
26326	26326C>T	C26326T	2	A;A3	0	-	2
26333	26333C>T	C26333T	1	A3	0	-	1
26340	26340C>T	C26340T	1	A1a3a	0	-	1
26370	26370C>T	C26370T	1	A	0	-	1
26392	26392A>G	A26392G	1	A1a2a1	0	-	1
26398	26398G>A	G26398A	1	A2a2a6	0	-	1
26447	26447C>T	C26447T	2	A2a4;A3a1a1	0	-	2
26450	26450G>T	G26450T	1	A2a2c	0	-	1
26458	26458G>T	G26458T	1	A	0	-	1
26459	26459A>G	A26459G	1	A2a2a	0	-	1
26461	26461C>T	C26461T	3	A2a2a15;A2a4a;A2a14	0	-	3
26464	26464C>T	C26464T	3	A1a3a1;A2a2;B1a1b	0	-	3
26488	26488T>C	T26488C	1	A1a3a	0	-	1
26512	26512T>C	T26512C	1	A2a	0	-	1
26527	26527C>T	C26527T	1	A2a7	0	-	1
26530	26530A>G	A26530G	1	B1a1	1	A2a1	2
26533	26533C>T	C26533T	1	A6	0	-	1
26596	26596G>T	G26596T	1	B1a1	0	-	1
26620	26620G>T	G26620T	1	A1a1	0	-	1
26625	26625C>T	C26625T	1	A2a2a	0	-	1
26640	26640G>T	G26640T	1	A1	0	-	1
26642	26642C>T	C26642T	2	A2a4;B3a	0	-	2
26677	26677T>C	T26677C	1	A1	0	-	1
26681	26681C>T	C26681T	2	A2a2c1a;A2a5c	0	-	2
26684	26684C>T	C26684T	1	A2a	0	-	1
26690	26690G>T	G26690T	1	A2a4	0	-	1
26713	26713G>T	G26713T	1	A2a2a9	0	-	1
26720	26720G>C	G26720C	1	A3a1a3	0	-	1
26729	26729T>C	T26729C	0	-	1	B5	1
26730	26730G>T	G26730T	1	A2a4	0	-	1
26730	26730G>A	G26730A	1	B1a1g	0	-	1
26735	26735C>T	C26735T	1	A1a3a3	1	A2a2b2	2
26803	26803G>T	G26803T	1	A2a	0	-	1
26834	26834G>T	G26834T	1	B5	0	-	1
26858	26858C>T	C26858T	1	A2a9	0	-	1
26864	26864A>G	A26864G	1	A2a13	0	-	1
26885	26885C>T	C26885T	0	-	1	A1a3a3	1
26894	26894C>T	C26894T	1	A2a4g	0	-	1
26936	26936C>T	C26936T	1	B1a1f	0	-	1
26945	26945A>T	A26945T	1	A2a4d	0	-	1
26994	26994C>T	C26994T	1	A1a3a	0	-	1
27005	27005C>T	C27005T	2	A1a;A2a2a2	0	-	2
27046	27046C>T	C27046T	3	A2a;A2a4;A2a11	1	A2a4a	4
27056	27056T>C	T27056C	1	B1a1	0	-	1
27059	27059C>T	C27059T	1	A2a2a15	0	-	1
27074	27074G>A	G27074A	1	A1a3a2	0	-	1
27092	27092C>T	C27092T	1	A2a5	0	-	1
27120	27120A>T	A27120T	1	A2a2a	0	-	1
27131	27131C>T	C27131T	1	A5	0	-	1
27147	27147G>C	G27147C	0	-	1	A5	1
27163	27163G>T	G27163T	1	A2a2a14	0	-	1
27167	27167C>T	C27167T	1	B1a1	0	-	1
27200	27200A>G	A27200G	1	B1a1	0	-	1
27208	27208C>T	C27208T	1	A2a3	0	-	1
27214	27214G>T	G27214T	1	A3	0	-	1
27217	27217G>T	G27217T	1	A1a3a	0	-	1
27222	27222T>C	T27222C	1	A2a4	0	-	1
27233	27233T>C	T27233C	1	A2a4	0	-	1
27237	27237A>T	A27237T	1	B1a1	0	-	1
27261	27261G>T	G27261T	1	A2a	0	-	1
27263	27263C>T	C27263T	2	A2a5;A2a7	0	-	2
27281	27281G>T	G27281T	1	A2a4	0	-	1
27282	27282G>A	G27282A	1	A3	0	-	1
27289	27289G>T	G27289T	1	A2a2	0	-	1
27296	27296T>C	T27296C	1	A2a2	0	-	1
27299	27299T>C	T27299C	2	A2a2a;A2a4j	0	-	2
27302	27302A>G	A27302G	1	A2a4d	0	-	1
27327	27327G>T	G27327T	1	B1a1i	1	B1a1i1	2
27338	27338A>G	A27338G	1	A2a16	0	-	1
27364	27364G>T	G27364T	1	B1a1	0	-	1
27366	27366G>T	G27366T	1	A2a	0	-	1
27384	27384T>C	T27384C	3	A1a5;A3a1;A3a1a	1	B1a1e	4
27390	27390G>C	G27390C	1	A2a2a	0	-	1
27393	27393C>T	C27393T	1	A2a4b	0	-	1
27406	27406C>T	C27406T	1	A2a4c1	0	-	1
27407	27407T>C	T27407C	1	A2a2a	0	-	1
27419	27419T>C	T27419C	1	A2a3	0	-	1
27421	27421A>G	A27421G	1	A2a2a10	0	-	1
27430	27430G>A	G27430A	2	A2a2a1b;A2a4	0	-	2
27431	27431C>T	C27431T	1	B1a1	0	-	1
27434	27434C>T	C27434T	1	A2a2a	0	-	1
27447	27447T>C	T27447C	1	A2a2a	0	-	1
27476	27476C>T	C27476T	1	A2a12a	0	-	1
27478	27478G>T	G27478T	2	A2a2a;B1a1b	0	-	2
27490	27490G>T	G27490T	1	A2a2a	0	-	1
27493	27493C>T	C27493T	1	A	0	-	1
27506	27506G>T	G27506T	1	A2a5	0	-	1
27513	27513C>T	C27513T	1	A2a4c1	0	-	1
27514	27514G>T	G27514T	1	A2a2a1b	0	-	1
27525	27525A>G	A27525G	0	-	1	B1a1h	1
27532	27532C>T	C27532T	1	A2a2a	0	-	1
27546	27546T>C	T27546C	1	A2a2a	0	-	1
27553	27553T>C	T27553C	1	A2a2a10	0	-	1
27554	27554T>C	T27554C	1	A	0	-	1
27559	27559C>T	C27559T	1	A1a3a	0	-	1
27577	27577C>T	C27577T	1	A9	0	-	1
27593	27593G>T	G27593T	1	A2a2c	0	-	1
27595	27595C>T	C27595T	1	A2a4a	0	-	1
27600	27600C>T	C27600T	1	A1a3a	0	-	1
27612	27612C>G	C27612G	1	A3a1a	0	-	1
27613	27613G>T	G27613T	1	A3a1a1	0	-	1
27615	27615C>G	C27615G	1	A	0	-	1
27618	27618T>C	T27618C	2	A2a4h;B	0	-	2
27635	27635C>T	C27635T	0	-	1	B5a1a	1
27645	27645T>C	T27645C	1	A2a2a10	0	-	1
27654	27654C>T	C27654T	1	A2a2a3	0	-	1
27661	27661C>T	C27661T	1	A4	0	-	1
27662	27662A>C	A27662C	1	A7	0	-	1
27669	27669A>T	A27669T	1	A	0	-	1
27669	27669A>G	A27669G	0	-	1	A4c	1
27670	27670G>T	G27670T	1	A2a2c	0	-	1
27679	27679C>T	C27679T	2	A2a3d;A2a4	0	-	2
27684	27684C>T	C27684T	1	A2a5	0	-	1
27703	27703G>T	G27703T	2	A1a3a;A2a14a	0	-	2
27741	27741C>T	C27741T	1	B1a1	0	-	1
27751	27751A>T	A27751T	1	A2a4	0	-	1
27754	27754G>T	G27754T	1	A	0	-	1
27798	27798G>T	G27798T	1	A2a4	0	-	1
27804	27804C>T	C27804T	1	A3	0	-	1
27806	27806G>T	G27806T	1	A11	0	-	1
27806	27806G>A	G27806A	1	B1a1e	0	-	1
27844	27844T>C	T27844C	1	A2a2a1a	0	-	1
27849	27849C>T	C27849T	1	A4	0	-	1
27869	27869T>C	T27869C	1	A2a2a	0	-	1
27870	27870G>A	G27870A	1	A2a7	0	-	1
27870	27870G>T	G27870T	1	A2a12	0	-	1
27877	27877G>T	G27877T	1	A2a2c	0	-	1
27925	27925C>T	C27925T	2	A1a5;B2	0	-	2
27944	27944C>T	C27944T	1	A	0	-	1
27945	27945C>T	C27945T	1	B1a1j	0	-	1
27964	27964C>T	C27964T	2	A3a;A3a1a2	1	A2a2a9	3
27996	27996G>T	G27996T	1	A2a	0	-	1
27998	27998C>T	C27998T	1	A2a5	0	-	1
27999	27999C>T	C27999T	1	B5a1a	0	-	1
28001	28001G>T	G28001T	2	A2a;A2a2	0	-	2
28061	28061T>C	T28061C	1	A2a2a	0	-	1
28077	28077G>T	G28077T	4	A2a2a;A2a4b1;A2a4i;A4	0	-	4
28077	28077G>C	G28077C	0	-	1	B5	1
28086	28086G>T	G28086T	1	A2a2	0	-	1
28087	28087C>G	C28087G	1	A2a2a	0	-	1
28093	28093C>T	C28093T	1	A	0	-	1
28099	28099C>T	C28099T	1	A2a2a9	0	-	1
28116	28116G>A	G28116A	1	A2a	0	-	1
28121	28121C>T	C28121T	1	A2a	0	-	1
28139	28139C>A	C28139A	1	A2	0	-	1
28139	28139C>T	C28139T	1	A2a2a	0	-	1
28144	28144T>C	T28144C	0	-	1	B	1
28153	28153C>T	C28153T	1	A2a2c1a	0	-	1
28183	28183G>A	G28183A	1	A	0	-	1
28199	28199T>C	T28199C	1	A2a2a	0	-	1
28202	28202G>T	G28202T	1	A3a1a3	0	-	1
28202	28202G>A	G28202A	0	-	1	A2a3e	1
28225	28225A>G	A28225G	1	A4	0	-	1
28229	28229T>G	T28229G	1	B1a1	0	-	1
28233	28233G>A	G28233A	1	A	0	-	1
28233	28233G>T	G28233T	1	A2a3	0	-	1
28253	28253C>T	C28253T	3	A;A2a2a;A2a3	0	-	3
28283	28283A>G	A28283G	1	B1a1b	0	-	1
28290	28290C>T	C28290T	1	A2a3	0	-	1
28291	28291C>T	C28291T	1	A9	0	-	1
28297	28297T>C	T28297C	1	A2a2a1b	0	-	1
28300	28300G>T	G28300T	2	A2a4;B1a1i1	0	-	2
28305	28305A>C	A28305C	2	A;A3a1a	0	-	2
28308	28308C>T	C28308T	1	A2a2	0	-	1
28310	28310C>T	C28310T	2	A2a3;A2a10	0	-	2
28311	28311C>T	C28311T	2	A1a6;B3a1	1	A3b	3
28315	28315C>T	C28315T	2	B;B1a1a	0	-	2
28325	28325G>A	G28325A	1	A2a2a	0	-	1
28338	28338A>G	A28338G	0	-	1	A1a4	1
28340	28340T>C	T28340C	1	A12	0	-	1
28344	28344C>A	C28344A	2	A2a4;A2a4a1	1	A2a4a2	3
28344	28344C>T	C28344T	1	B1a1g	0	-	1
28368	28368G>A	G28368A	1	A2a2a	0	-	1
28369	28369C>T	C28369T	1	A2a2a	0	-	1
28373	28373G>T	G28373T	2	A2a1a;A2a2a	0	-	2
28374	28374G>A	G28374A	1	A2a3	0	-	1
28376	28376G>A	G28376A	1	B1a1	0	-	1
28378	28378G>T	G28378T	5	A;A1a3a;A1a5;A3;B1a1i1	0	-	5
28396	28396G>T	G28396T	1	A2a19	0	-	1
28409	28409C>T	C28409T	1	A	0	-	1
28432	28432C>T	C28432T	1	A2a4c1	0	-	1
28451	28451G>C	G28451C	1	A2a2a	0	-	1
28457	28457G>A	G28457A	1	A3a1	0	-	1
28472	28472C>T	C28472T	1	A2a2a4a	0	-	1
28519	28519C>A	C28519A	1	A2a2a	0	-	1
28519	28519C>T	C28519T	1	A2a15	0	-	1
28528	28528C>T	C28528T	1	A2a2a	0	-	1
28576	28576G>A	G28576A	1	A2a14a	0	-	1
28580	28580G>T	G28580T	1	B9	1	A2a4c1a	2
28603	28603C>T	C28603T	1	A2a4	0	-	1
28622	28622C>T	C28622T	1	A1a2b	0	-	1
28629	28629C>T	C28629T	0	-	1	A2a12a	1
28635	28635T>A	T28635A	1	B8	0	-	1
28638	28638C>T	C28638T	1	A2a5	0	-	1
28648	28648T>C	T28648C	1	A3a1a4	0	-	1
28651	28651C>T	C28651T	1	A2a5	0	-	1
28655	28655G>T	G28655T	1	A2a5c	0	-	1
28657	28657C>T	C28657T	1	A2a	1	B3a	2
28677	28677C>T	C28677T	1	A2a2a	0	-	1
28688	28688T>C	T28688C	2	A;A2a	1	A3a1	3
28690	28690G>T	G28690T	1	A2a3	0	-	1
28705	28705T>G	T28705G	1	A4a1	0	-	1
28706	28706C>T	C28706T	1	B	0	-	1
28708	28708C>T	C28708T	1	B1a1	0	-	1
28709	28709A>T	A28709T	1	B1a1	0	-	1
28716	28716C>T	C28716T	1	A	0	-	1
28720	28720C>T	C28720T	2	A2a;A2a4	0	-	2
28725	28725C>T	C28725T	1	A	0	-	1
28727	28727G>T	G28727T	1	B1a1	0	-	1
28739	28739G>T	G28739T	2	A2a;A2a1	0	-	2
28743	28743T>C	T28743C	1	A1a	0	-	1
28765	28765A>G	A28765G	1	A2a3a	0	-	1
28775	28775C>T	C28775T	1	A2a1	0	-	1
28785	28785T>G	T28785G	3	A2a2a;A2a4a;A2a4a1	0	-	3
28786	28786C>T	C28786T	1	A4a1	0	-	1
28792	28792A>T	A28792T	1	B5	0	-	1
28798	28798G>C	G28798C	1	A2a4	0	-	1
28818	28818C>T	C28818T	1	A2a3	0	-	1
28821	28821C>A	C28821A	0	-	1	A2a2a3	1
28826	28826C>T	C28826T	4	A;A1a5;A2a7;B1a1	0	-	4
28830	28830C>T	C28830T	1	A3a1a	0	-	1
28830	28830C>A	C28830A	1	A10	0	-	1
28835	28835T>C	T28835C	2	A3a1a;A3a1a3	0	-	2
28836	28836C>T	C28836T	1	A2a2a	1	A2a19	2
28842	28842G>T	G28842T	0	-	1	A1a7	1
28844	28844C>T	C28844T	1	A2a3	0	-	1
28845	28845G>T	G28845T	2	A;A2a4d	0	-	2
28849	28849C>T	C28849T	3	A1;A2a2a;A2a4	0	-	3
28849	28849C>G	C28849G	1	A3a	0	-	1
28851	28851G>T	G28851T	1	A	1	A4a	2
28854	28854C>T	C28854T	3	A4;A9a;A9b	2	A2a5b;A9	5
28857	28857G>A	G28857A	0	-	1	A2a2a13	1
28861	28861T>C	T28861C	1	A	0	-	1
28863	28863C>T	C28863T	0	-	1	B3	1
28866	28866C>T	C28866T	1	A2a4f	0	-	1
28867	28867T>C	T28867C	1	A9b	0	-	1
28868	28868C>A	C28868A	1	B9	0	-	1
28869	28869C>T	C28869T	1	A1a3a	0	-	1
28871	28871G>A	G28871A	1	A2a2b	0	-	1
28876	28876C>T	C28876T	1	A1a3a	0	-	1
28878	28878G>A	G28878A	0	-	1	B4	1
28881	28881G>A	G28881A	1	A1a	1	A2a4	2
28885	28885A>G	A28885G	1	B9	0	-	1
28887	28887C>T	C28887T	2	A1a2d;A1a3a	0	-	2
28896	28896C>G	C28896G	1	B5a1	0	-	1
28910	28910A>T	A28910T	1	B1a1	0	-	1
28916	28916G>A	G28916A	1	A3	0	-	1
28924	28924T>C	T28924C	1	B1a1	0	-	1
28930	28930T>C	T28930C	1	A2a2a	0	-	1
28961	28961C>T	C28961T	1	A1a4	0	-	1
28963	28963T>A	T28963A	1	A3b	0	-	1
[truncated: 146 more rows]
