# Supplementary material for: Mapping genome variation of SARS-CoV-2 worldwide highlights the impact of COVID-19 super-spreaders
Source: HighWire-hosted journal article supplement (doi:10.1101/gr.266221.120), 2020-09-02
Supplement: Supplemental_Table_S2.xlsx [file Supplemental_Table_S2.xlsx]

## Sheet: Figure S2
Table S2. Mutational pathways along the branches of the parsimonious phylogeny of Figure 3.
Sars-Cov2 Clades							Mutations	Pathway
A							Ref. Seq.	-
	A1						G26144T	G26144T
		A1a					C14805T; G11083T	G26144T; C14805T; G11083T
			A1a1				C5142T	G26144T; C14805T; G11083T; C5142T
			A1a2				T17247C	G26144T; C14805T; G11083T; T17247C
				A1a2a			A1515G	G26144T; C14805T; G11083T; T17247C; A1515G
					A1a2a1		C9223T	G26144T; C14805T; G11083T; T17247C; A1515G; C9223T
				A1a2b			G29751C; T17859C; C16054T; T3034C	G26144T; C14805T; G11083T; T17247C; G29751C; T17859C; C16054T; T3034C
				A1a2c			T13402G; @T11083G	G26144T; C14805T; G11083T; T17247C; T13402G
				A1a2d			C25572T; A7479G	G26144T; C14805T; G11083T; T17247C; C25572T; A7479G
			A1a3				C2558T	G26144T; C14805T; G11083T; C2558T
				A1a3a			A2480G	G26144T; C14805T; G11083T; C2558T; A2480G
					A1a3a1		C9170T; G6977A; G6975T; T6971C	G26144T; C14805T; G11083T; C2558T; A2480G; C9170T; G6977A; G6975T; T6971C
					A1a3a2		C17010A	G26144T; C14805T; G11083T; C2558T; A2480G; C17010A
					A1a3a3		C26885T	G26144T; C14805T; G11083T; C2558T; A2480G; C26885T
			A1a4				A28338G; C15540T; G13627T	G26144T; C14805T; G11083T; A28338G; C15540T; G13627T
				A1a4a			C3096T	G26144T; C14805T; G11083T; A28338G; C15540T; G13627T; C3096T
			A1a5				C23707T	G26144T; C14805T; G11083T; C23707T
			A1a6				G5572T	G26144T; C14805T; G11083T; G5572T
			A1a7				G28842T	G26144T; C14805T; G11083T; G28842T
		A1b					T13929C	G26144T; T13929C
			A1b1				T21584G; C14724T; C9962T	G26144T; T13929C; T21584G; C14724T; C9962T
	A2						A23403G; C3037T; C241T	A23403G; C3037T; C241T
		A2a					C14408T	A23403G; C3037T; C241T; C14408T
			A2a1				A26530G	A23403G; C3037T; C241T; C14408T; A26530G
				A2a1a			G4255T	A23403G; C3037T; C241T; C14408T; A26530G; G4255T
			A2a2				G25563T	A23403G; C3037T; C241T; C14408T; G25563T
				A2a2a			C1059T	A23403G; C3037T; C241T; C14408T; G25563T; C1059T
					A2a2a1		C25688A	A23403G; C3037T; C241T; C14408T; G25563T; C1059T; C25688A
						A2a2a1a	C4320T	A23403G; C3037T; C241T; C14408T; G25563T; C1059T; C25688A; C4320T
						A2a2a1b	T13006C	A23403G; C3037T; C241T; C14408T; G25563T; C1059T; C25688A; T13006C
					A2a2a2		G29553A	A23403G; C3037T; C241T; C14408T; G25563T; C1059T; G29553A
					A2a2a3		C28821A	A23403G; C3037T; C241T; C14408T; G25563T; C1059T; C28821A
					A2a2a4		C11916T	A23403G; C3037T; C241T; C14408T; G25563T; C1059T; C11916T
						A2a2a4a	G29540A; C18998T	A23403G; C3037T; C241T; C14408T; G25563T; C1059T; C11916T; G29540A; C18998T
					A2a2a5		G24368T	A23403G; C3037T; C241T; C14408T; G25563T; C1059T; G24368T
					A2a2a6		C2523T	A23403G; C3037T; C241T; C14408T; G25563T; C1059T; C2523T
					A2a2a7		C1917T	A23403G; C3037T; C241T; C14408T; G25563T; C1059T; C1917T
					A2a2a8		C10851T	A23403G; C3037T; C241T; C14408T; G25563T; C1059T; C10851T
					A2a2a9		C27964T	A23403G; C3037T; C241T; C14408T; G25563T; C1059T; C27964T
					A2a2a10		C14925T	A23403G; C3037T; C241T; C14408T; G25563T; C1059T; C14925T
					A2a2a11		G15760A	A23403G; C3037T; C241T; C14408T; G25563T; C1059T; G15760A
					A2a2a12		A20755C	A23403G; C3037T; C241T; C14408T; G25563T; C1059T; A20755C
					A2a2a13		G28857A	A23403G; C3037T; C241T; C14408T; G25563T; C1059T; G28857A
						A2a2a13a	C23679T	A23403G; C3037T; C241T; C14408T; G25563T; C1059T; G28857A; C23679T
					A2a2a14		C379A	A23403G; C3037T; C241T; C14408T; G25563T; C1059T; C379A
					A2a2a15		C10582T	A23403G; C3037T; C241T; C14408T; G25563T; C1059T; C10582T
				A2a2b			C18877T	A23403G; C3037T; C241T; C14408T; G25563T; C18877T
					A2a2b1		C7765T	A23403G; C3037T; C241T; C14408T; G25563T; C18877T; C7765T
					A2a2b2		C26735T	A23403G; C3037T; C241T; C14408T; G25563T; C18877T; C26735T
						A2a2b2a	G24197T	A23403G; C3037T; C241T; C14408T; G25563T; C18877T; C26735T; G24197T
				A2a2c			C2416T	A23403G; C3037T; C241T; C14408T; G25563T; C2416T
					A2a2c1		G20578T	A23403G; C3037T; C241T; C14408T; G25563T; C2416T; G20578T
						A2a2c1a	C14786T	A23403G; C3037T; C241T; C14408T; G25563T; C2416T; G20578T; C14786T
					A2a2c2		G8371T	A23403G; C3037T; C241T; C14408T; G25563T; C2416T; G8371T
			A2a3				C15324T	A23403G; C3037T; C241T; C14408T; C15324T
				A2a3a			T13402G	A23403G; C3037T; C241T; C14408T; C15324T; T13402G
				A2a3b			C16887T	A23403G; C3037T; C241T; C14408T; C15324T; C16887T
				A2a3c			C15277T	A23403G; C3037T; C241T; C14408T; C15324T; C15277T
				A2a3d			A618G	A23403G; C3037T; C241T; C14408T; C15324T; A618G
				A2a3e			G28202A	A23403G; C3037T; C241T; C14408T; C15324T; G28202A
				A2a3f			A15860G	A23403G; C3037T; C241T; C14408T; C15324T; A15860G
				A2a3g			C25433T	A23403G; C3037T; C241T; C14408T; C15324T; C25433T
			A2a4				GGG28881AAC	A23403G; C3037T; C241T; C14408T; GGG28881AAC
				A2a4a			C27046T	A23403G; C3037T; C241T; C14408T; G28881A; C27046T
					A2a4a1		T13402G	A23403G; C3037T; C241T; C14408T; G28881A; C27046T; T13402G
					A2a4a2		C28344A	A23403G; C3037T; C241T; C14408T; G28881A; C27046T; C28344A
					A2a4a3		A25958G	A23403G; C3037T; C241T; C14408T; G28881A; C27046T; A25958G
						A2a4a3a	C24054T	A23403G; C3037T; C241T; C14408T; G28881A; C27046T; A25958G; C24054T
					A2a4a4		A11438G	A23403G; C3037T; C241T; C14408T; G28881A; C27046T; A11438G
					A2a4a5		C22277A	A23403G; C3037T; C241T; C14408T; G28881A; C27046T; C22277A
				A2a4b			T19839C	A23403G; C3037T; C241T; C14408T; G28881A; T19839C
					A2a4b1		A11839G	A23403G; C3037T; C241T; C14408T; G28881A; T19839C; A11839G
				A2a4c			C23731T	A23403G; C3037T; C241T; C14408T; G28881A; C23731T
					A2a4c1		G10097A	A23403G; C3037T; C241T; C14408T; G28881A; C23731T; G10097A
						A2a4c1a	G28580T	A23403G; C3037T; C241T; C14408T; G28881A; C23731T; G10097A; G28580T
				A2a4d			C313T	A23403G; C3037T; C241T; C14408T; G28881A; C313T
				A2a4e			C7564T	A23403G; C3037T; C241T; C14408T; G28881A; C7564T
				A2a4f			C3373A	A23403G; C3037T; C241T; C14408T; G28881A; C3373A
				A2a4g			C18713T	A23403G; C3037T; C241T; C14408T; G28881A; C18713T
				A2a4h			G10265A	A23403G; C3037T; C241T; C14408T; G28881A; G10265A
				A2a4i			G19509A; C19170T	A23403G; C3037T; C241T; C14408T; G28881A; G19509A; C19170T
				A2a4j			T29148C	A23403G; C3037T; C241T; C14408T; G28881A; T29148C
				A2a4k			A13947T	A23403G; C3037T; C241T; C14408T; G28881A; A13947T
			A2a5				A20268G	A23403G; C3037T; C241T; C14408T; A20268G
				A2a5a			A10323G	A23403G; C3037T; C241T; C14408T; A20268G; A10323G
				A2a5b			C28854T	A23403G; C3037T; C241T; C14408T; A20268G; C28854T
				A2a5c			G29734C	A23403G; C3037T; C241T; C14408T; A20268G; G29734C
			A2a6				G24077T	A23403G; C3037T; C241T; C14408T; G24077T
			A2a7				T13402G	A23403G; C3037T; C241T; C14408T; T13402G
			A2a8				A187G	A23403G; C3037T; C241T; C14408T; A187G
			A2a9				C25350T	A23403G; C3037T; C241T; C14408T; C25350T
			A2a10				C29144T	A23403G; C3037T; C241T; C14408T; C29144T
			A2a11				AG24389CC	A23403G; C3037T; C241T; C14408T; AG24389CC
			A2a12				A24862G	A23403G; C3037T; C241T; C14408T; A24862G
				A2a12a			C28629T; T658C	A23403G; C3037T; C241T; C14408T; A24862G; C28629T; T658C
			A2a13				C29353T; T7438C	A23403G; C3037T; C241T; C14408T; C29353T; T7438C
			A2a14				G25429T	A23403G; C3037T; C241T; C14408T; G25429T
				A2a14a			C16289T	A23403G; C3037T; C241T; C14408T; G25429T; C16289T
			A2a15				C23575T	A23403G; C3037T; C241T; C14408T; C23575T
				A2a15a			G23587C	A23403G; C3037T; C241T; C14408T; C23575T; G23587C
			A2a16				T14073C; G11417T	A23403G; C3037T; C241T; C14408T; T14073C; G11417T
			A2a17				C4809T	A23403G; C3037T; C241T; C14408T; C4809T
			A2a18				G3871T	A23403G; C3037T; C241T; C14408T; G3871T
			A2a19				C28836T; C13862T	A23403G; C3037T; C241T; C14408T; C28836T; C13862T
	A3						G11083T	G11083T
		A3a					G1397A	G11083T; G1397A
			A3a1				T28688C	G11083T; G1397A; T28688C
				A3a1a			G29742T	G11083T; G1397A; T28688C; G29742T
					A3a1a1		G8653T; C884T	G11083T; G1397A; T28688C; G29742T; G8653T; C884T
					A3a1a2		C1076T	G11083T; G1397A; T28688C; G29742T; C1076T
					A3a1a3		A9514G	G11083T; G1397A; T28688C; G29742T; A9514G
					A3a1a4		C23934T; C1059T	G11083T; G1397A; T28688C; G29742T; C23934T; C1059T
					A3a1a5		G29374A	G11083T; G1397A; T28688C; G29742T; G29374A
		A3b					C28311T; C23929T; C13730T; C6312A	G11083T; C28311T; C23929T; C13730T; C6312A
		A3c					C29635T	G11083T; C29635T
			A3c1				C18656T	G11083T; C29635T; C18656T
	A4						G2891A; G1440A	G2891A; G1440A
		A4a					G28851T	G2891A; G1440A; G28851T
			A4a1				C25669T	G2891A; G1440A; G28851T; C25669T
		A4b					C7011T	G2891A; G1440A; C7011T
		A4c					A27669G	G2891A; G1440A; A27669G
	A5						G27147C	G27147C
	A6						C21707T	C21707T
	A7						G2293T	G2293T
	A8						C29303T; C15324T	C29303T; C15324T
	A9						C28854T	C28854T
	A9a						A5084G	A5084G
	A9b						C12896T; C1912T	C12896T; C1912T
	A10						C17373T	C17373T
	A11						G29711T	G29711T
	A12						G29449T	G29449T
B							T28144C; C8782T	T28144C; C8782T
	B1						C18060T	T28144C; C8782T; C18060T
		B1a					A17858G	T28144C; C8782T; C18060T; A17858G
			B1a1				C17747T	T28144C; C8782T; C18060T; A17858G; C17747T
				B1a1a			T10771C	T28144C; C8782T; C18060T; A17858G; C17747T; T10771C
				B1a1b			A24694T	T28144C; C8782T; C18060T; A17858G; C17747T; A24694T
					B1a1b1		T9445C	T28144C; C8782T; C18060T; A17858G; C17747T; A24694T; T9445C
				B1a1c			T23010C	T28144C; C8782T; C18060T; A17858G; C17747T; T23010C
				B1a1d			G22988A	T28144C; C8782T; C18060T; A17858G; C17747T; G22988A
				B1a1e			T27384C	T28144C; C8782T; C18060T; A17858G; C17747T; T27384C
				B1a1f			T15927G	T28144C; C8782T; C18060T; A17858G; C17747T; T15927G
				B1a1g			C5784T	T28144C; C8782T; C18060T; A17858G; C17747T; C5784T
				B1a1h			A27525G	T28144C; C8782T; C18060T; A17858G; C17747T; A27525G
				B1a1i			C6310T	T28144C; C8782T; C18060T; A17858G; C17747T; C6310T
					B1a1i1		G27327T	T28144C; C8782T; C18060T; A17858G; C17747T; C6310T; G27327T
				B1a1j			C832T	T28144C; C8782T; C18060T; A17858G; C17747T; C832T
	B2						C29095T	T28144C; C8782T; C29095T
	B3						C28863T; C14805T; T9477A	T28144C; C8782T; C28863T; C14805T; T9477A
		B3a					C28657T; G25979T	T28144C; C8782T; C28863T; C14805T; T9477A; C28657T; G25979T
			B3a1				C4540T	T28144C; C8782T; C28863T; C14805T; T9477A; C28657T; G25979T; C4540T
	B4						G28878A	T28144C; C8782T; G28878A
		B4a					G29742A	T28144C; C8782T; G28878A; G29742A
			B4a1				A22606T	T28144C; C8782T; G28878A; G29742A; A22606T
		B4b					G16381A	T28144C; C8782T; G28878A; G16381A
	B5						G28077C; T26729C; C24034T	T28144C; C8782T; G28077C; T26729C; C24034T
		B5a					T490A	T28144C; C8782T; G28077C; T26729C; C24034T; T490A
			B5a1				A29700G	T28144C; C8782T; G28077C; T26729C; C24034T; T490A; A29700G
				B5a1a			C27635T	T28144C; C8782T; G28077C; T26729C; C24034T; T490A; A29700G; C27635T
	B6						A11430G	T28144C; C8782T; A11430G
	B7						G5062T; T4402C	T28144C; C8782T; G5062T; T4402C
	B8						T3171C	T28144C; C8782T; T3171C
	B9						C26088T	T28144C; C8782T; C26088T
