# Supplementary material for: Mapping genome variation of SARS-CoV-2 worldwide highlights the impact of COVID-19 super-spreaders
Source: HighWire-hosted journal article supplement (doi:10.1101/gr.266221.120), 2020-09-02
Supplement: Supplemental_Table_S3.xlsx [file Supplemental_Table_S3.xlsx]

## Sheet: Table S3
Table S3. Diversity indices for CoV-2 sequences by regions, haplogroups and genes. Totals does not necessarily much when analyzed regions and haplogroups; this is because a minor proportion of sequences could not be unequivocally classified into an haplogroup.
		n total	n-unique	π	HD	Tajima’s D
	Total	3393	1741	0.000289	0.993	-2.71
	Regions
	Africa	58	40	0.000212	0.981	-2.32
	Asia	520	304	0.000201	0.977	-2.79
	Europe	1575	800	0.000234	0.99	-2.73
	North America	859	443	0.000297	0.971	-2.65
	Oceania	359	224	0.000363	0.99	-2.52
	South America	22	14	0.000263	0.926	-0.887
	Haplogroups
	A	2724	1416	0.000244	0.991	-2.73
	A1	338	217	0.000205	0.991	-2.72
	A1a	287	182	0.000191	0.989	-2.71
	A2	1851	884	0.000148	0.984	-2.77
	A2a	1841	878	0.000148	0.984	-2.77
	A2a2	625	317	0.000125	0.95	-2.82
	A2a2a	481	240	0.000106	0.919	-2.85
	A2a4	521	235	0.000106	0.953	-2.78
	B	664	322	0.000201	0.954	-2.72
	B1	424	195	9.04e-05	0.899	-2.84
	B1a	414	191	8.8e-05	0.894	-2.85
	B1a1	399	186	8.73e-05	0.886	-2.85
	Genes
	ORF1a	3393	900	0.000222	0.93	-2.71
	ORF1b	3393	507	0.000277	0.851	-2.66
	S	3393	318	0.000252	0.681	-2.68
	N	3393	170	0.000326	0.314	-2.65
	ORF3a	3393	102	0.000787	0.53	-2.48
	ORF7a	3393	44	0.000147	0.0511	-2.48
	M	3393	42	0.000281	0.173	-2.32
	ORF8	3393	30	0.00107	0.346	-2.07
	ORF6	3393	20	0.000151	0.0263	-2.11
	ORF10	3393	18	0.000365	0.0269	-2.2
	E	3393	18	9.07e-05	0.0194	-2.06
	Intergenic	3393	79	0.00217	0.594	-2.33
