# Supplementary material for: Mapping genome variation of SARS-CoV-2 worldwide highlights the impact of COVID-19 super-spreaders
Source: HighWire-hosted journal article supplement (doi:10.1101/gr.266221.120), 2020-09-02
Supplement: Supplemental_Table_S4.xlsx [file Supplemental_Table_S4.xlsx]

## Sheet: Table S4
Table S4. Haplotypes repeated more than 7 times in the database and that might be diffuninated in the populations by super-spreader. Number of incidences were obtained by first eliminating sequences showing ambiguous haplogroup classification.
Haplotype ID	Sequence variants	Haplogroup	n	AF	AS	EU	NA	OC	SA
H1	C1059T-C14408T-A23403G-C241T-G25563T-C3037T	A2a2a	133	0	0	75	48	10	0
H2	C17747T-A17858G-C18060T-T28144C-C8782T	B1a1	132	0	0	0	130	2	0
H3	C14408T-A23403G-C241T-GGG28881AAC-GGG28881AAC-C3037T	A2a4	94	5	6	60	10	12	1
H4	Reference sequence	A	78	0	62	5	11	0	0
H5	C14408T-A23403G-C241T-C3037T	A2a	61	0	2	38	10	7	4
H6	C14408T-A23403G-C241T-C27046T-GGG28881AAC-GGG28881AAC-C3037T	A2a4a	55	0	0	53	0	1	1
H7	C14408T-C15324T-A23403G-C241T-C3037T	A2a3	38	4	0	32	1	1	0
H8	A10323G-C14408T-A20268G-A23403G-C241T-C3037T	A2a5a	37	0	0	37	0	0	0
H9	G11083T	A3	33	0	32	0	1	0	0
H10	C14805T-G25979T-T28144C-C28657T-C28863T-C8782T-T9477A	B3a	26	0	0	21	1	0	4
H11	T28144C-C8782T	B	24	0	24	0	0	0	0
H12	C14408T-C18877T-A23403G-C241T-G25563T-C3037T	A2a2b	24	3	0	4	17	0	0
H13	C17747T-A17858G-C18060T-A24694T-T28144C-C8782T	B1a1b	23	0	0	0	5	18	0
H14	G11083T-C14805T-T17247C-G26144T	A1a2	22	0	1	16	2	3	0
H15	C14408T-A20268G-A23403G-C241T-C3037T	A2a5	22	0	1	19	1	1	0
H16	C1059T-C14408T-A23403G-C241T-G25563T-G29553A-C3037T	A2a2a2	22	0	0	0	22	0	0
H17	G1440A-C25669T-G28851T-G2891A	A4a1	18	0	0	18	0	0	0
H18	C14408T-A187G-A23403G-C241T-C3037T	A2a8	16	0	0	11	5	0	0
H19	C14408T-A23403G-C241T-A26530G-C3037T	A2a1	16	0	1	7	0	8	0
H20	T18736C-G19684T-C24034T-T26729C-C27635T-G28077C-T28144C-A29700G-C3177T-T490A-C8782T	B5a1a	15	0	0	0	0	15	0
H21	C14408T-A23403G-G24077T-C241T-C3037T	A2a6	14	0	1	13	0	0	0
H22	G11083T-C14805T-A2480G-C2558T-G26144T	A1a3a	12	0	0	10	0	2	0
H23	G1440A-G28851T-G2891A	A4a	12	0	0	12	0	0	0
H24	G1440A-G2891A	A4	11	1	0	10	0	0	0
H25	C14408T-A23403G-C241T-C25350T-C3037T	A2a9	11	0	0	10	0	1	0
H26	C14408T-C18713T-A23403G-C241T-GGG28881AAC-GGG28881AAC-C3037T	A2a4g	10	0	0	10	0	0	0
H27	C14408T-T19839C-A23403G-C241T-GGG28881AAC-GGG28881AAC-C3037T	A2a4b	10	0	0	8	1	1	0
H28	T28144C-T4402C-G5062T-C8782T	B7	9	0	9	0	0	0	0
H29	A17858G-C18060T-T28144C-C8782T	B1a	9	0	0	0	9	0	0
H30	T11320C-C17747T-A17858G-C18060T-T28144C-C8782T	B1a1	9	0	0	0	9	0	0
H31	G11083T-C14805T-T17247C-G26144T-C5142T	A1a1	9	0	0	9	0	0	0
H32	C14408T-A23403G-C241T-C2416T-G25563T-C3037T	A2a2c	9	0	0	5	4	0	0
H33	C14408T-A23403G-C241T-C29144T-C3037T	A2a10	9	0	0	9	0	0	0
H34	C1059T-C14408T-A23403G-C241T-G25563T-C25688T-C3037T-C4320T	A2a2a1a	9	0	0	9	0	0	0
H35	G11083T-C13730T-C23929T-C28311T-C6312A	A3b	8	0	0	0	3	5	0
H36	G11083T-A1321C-C14805T-T17247C-G26144T	A1a2	8	0	0	8	0	0	0
H37	C14408T-A23403G-C241T-GGG28881AAC-GGG28881AAC-C3037T-C313T	A2a4d	8	0	1	2	3	0	2
H38	C14408T-A23403G-C241T-C2416T-G25563T-C3037T-G8371T	A2a2c2	8	1	0	7	0	0	0
H39	G10097A-C14408T-A23403G-C23731T-C241T-G28580T-GGG28881AAC-GGG28881AAC-C3037T-T7438C	A2a4c1a	8	0	0	8	0	0	0
H40	C14408T-A23403G-C24054T-C241T-A25958G-C27046T-GGG28881AAC-GGG28881AAC-C3037T	A2a4a3a	8	0	0	8	0	0	0
H41	C14408T-A23403G-C241T-C27046T-C28344A-GGG28881AAC-GGG28881AAC-C3037T	A2a4a2	8	0	0	8	0	0	0
H42	C1059T-C11916T-C14408T-C18998T-A23403G-C241T-G25563T-G29540A-C3037T	A2a2a4a	8	0	0	0	8	0	0
H43	C1059T-T13006C-C14408T-A23403G-C241T-G25563T-C25688T-C3037T	A2a2a1b	8	3	0	3	2	0	0
H44	T28144C-C29095T-C8782T	B2	7	0	7	0	0	0	0
H45	G11083T-C14805T-A1515G-T17247C-G26144T-C9223T	A1a2a1	7	0	0	5	1	1	0
H46	C14408T-A23403G-C241T-GGG28881AAC-GGG28881AAC-C3037T-C3373A	A2a4f	7	0	0	7	0	0	0
H47	C14408T-A23403G-C241T-C3037T-G3871T	A2a18	7	0	0	0	7	0	0
H48	C14408T-C18877T-A23403G-C241T-G24197T-G25563T-C26735T-C3037T	A2a2b2a	7	0	0	7	0	0	0
H49	C1059T-C14408T-A23403G-C241T-C2523T-G25563T-C3037T	A2a2a6	7	0	0	0	0	7	0
