# Supplementary material for: Mapping genome variation of SARS-CoV-2 worldwide highlights the impact of COVID-19 super-spreaders
Source: HighWire-hosted journal article supplement (doi:10.1101/gr.266221.120), 2020-09-02
Supplement: Supplemental_Table_S5.xlsx [file Supplemental_Table_S5.xlsx]

## Sheet: Table S5
Table S5. Association test between main haplogroups with gender and age.Totals does not necessarily much when analyzed regions and haplogroups; this is because a minor proportion of sequences could not be unequivocally classified into an haplogroup
Haplogroup	Total n	Gender - Total n	Female proportion	Gender P-value	Age - Total n	Median age (IQR)	Age P-value
A	2724	2156	46.3	-	2134	50 (35-64)	-
B	664	284	39.8	0.042	275	54 (37-64.5)	0.065
no A1a	3082	2172	45.3	-	2147	50 (35-63.5)	-
A1a	287	251	47	0.64	245	48 (33-66)	0.752
no A2a	1528	956	44.7	-	926	51 (36-64)	-
A2a	1841	1467	46.1	0.504	1466	50 (35-63.8)	0.235
no A3	3181	2324	45	-	2304	50 (35-64)	-
A3	188	99	57.6	0.017	88	47 (37-60)	0.374
no A3a	3297	2360	45.3	-	2340	50 (35-64)	-
A3a	72	63	54	0.2	52	42.5 (36.8-59.2)	0.091
no A4a	3330	2386	45.6	-	2353	50 (35-63)	-
A4a	39	37	37.8	0.407	39	76 (48-87)	<0.001
no A9b	3367	2421	45.5	-	2390	50 (35-64)	-
A9b	2	2	50	1	2	40.5 (37.8-43.2)	0.418
no B1a	2955	2334	45.5	-	2303	50 (35-64)	-
B1a	414	89	44.9	1	89	56 (46-62)	0.024
no B3a	3318	2375	45.7	-	2345	50 (35-63)	-
B3a	51	48	35.4	0.188	47	61 (50.5-82)	<0.001
