# Supplementary material for: Mapping genome variation of SARS-CoV-2 worldwide highlights the impact of COVID-19 super-spreaders
Source: HighWire-hosted journal article supplement (doi:10.1101/gr.266221.120), 2020-09-02
Supplement: Supplemental_Table_S6.xlsx [file Supplemental_Table_S6.xlsx]

## Sheet: Table S6 - Inter-specific
Table S6. Omega values (ka/ks) computed for the coronavirus genomes considered in the ML tree of Figure S1.
	Gene	omega = ka/ks
	ORF1a	0.05900
	ORF1b	0.01847
	S	0.07808
	ORF3a	0.15145
	E	0.11427
	M	0.06064
	ORF6	0.08888
	ORF7a	0.11294
	ORF8	0.07264
	N	0.12636
	ORF10	1.70447

## Sheet: Table S6 - Intra-specific Cov-2
Table S6. Omega values (ka/ks) computed for the coronavirus genomes belonging to haplogroup A2a (n= 20) and B1a (n=20). We used the gene definition of the reference sequence.
	Gene	omega = ka/ks
	ORF1a	0.19742
	ORF1b	0.65257
	S	1.04877
	ORF3a	−
	E	−
	M	0.99877
	ORF6	−
	ORF7a	0.99937
	ORF8	−
	N	0.0001
	ORF10	0.99968
