# Supplementary material for: Mapping genome variation of SARS-CoV-2 worldwide highlights the impact of COVID-19 super-spreaders
Source: HighWire-hosted journal article supplement (doi:10.1101/gr.266221.120), 2020-09-02
Supplement: Supplemental_Table_S7.xlsx [file Supplemental_Table_S7.xlsx]

## Sheet: Table S7
Table S7. Patterns of mutations in the HQ CoV-2 dataset in the total dataset and in main haplogroups. Totals does not necessarily much when analyzed regions and haplogroups; this is because a minor proportion of sequences could not be unequivocally classified into an haplogroup
		Total		Haplogroup A		Haplogroup B		Haplogroup A2a
		n	Frequency	n	Frequency	n	Frequency	n	Frequency
	Number of sequences	3393	-	2724	-	664	-	1853	-
	Number of different sequences	1741	-	1416	-	322	-	888	-
	Number of variables in different sequences	2181	-	1810	-	488	-	1118	-
	Transitions	1532	0.7	1275	0.7	356	0.73	792	0.71
	Purine transition (A<>G)	422	0.28	346	0.27	90	0.25	199	0.25
	Pyrimidine transitions (C<>T)	1110	0.72	929	0.73	266	0.75	593	0.75
	Transversions	649	0.3	535	0.3	132	0.27	326	0.29
	Pyrimidine to purine	153	0.24	124	0.23	30	0.23	66	0.2
	T>A	44	0.29	30	0.24	14	0.47	13	0.2
	T>G	43	0.28	35	0.28	8	0.27	23	0.35
	C>A	48	0.31	42	0.34	7	0.23	25	0.38
	C>G	18	0.12	17	0.14	1	0.03	5	0.08
	Purine to pyrimidine	496	0.76	411	0.77	102	0.77	260	0.8
	A>T	56	0.11	40	0.1	17	0.17	20	0.08
	A>C	45	0.09	35	0.09	10	0.1	18	0.07
	G>C	41	0.08	35	0.09	6	0.06	19	0.07
	G>T	354	0.71	301	0.73	69	0.68	203	0.78
	Ratio transitions:transversions	2.36	-	2.38	-	2.7	-	2.43	-
	Synonymous	796	0.36	654	0.36	184	0.38	403	0.36
	Non-synonymous	1306	0.6	1088	0.6	282	0.58	668	0.6
	Missense	1291	0.99	1076	0.99	279	0.99	662	0.99
	Missense in last codon	2	0	2	0	0	0	1	0
	Start lost	12	0.01	9	0.01	3	0.01	5	0.01
	Stop gain	1	0	1	0	0	0	0	0
	Intergenic	79	0.04	68	0.04	22	0.05	47	0.04
