# Supplementary material for: Mapping genome variation of SARS-CoV-2 worldwide highlights the impact of COVID-19 super-spreaders
Source: HighWire-hosted journal article supplement (doi:10.1101/gr.266221.120), 2020-09-02
Supplement: Supplemental_Table_S8.xlsx [file Supplemental_Table_S8.xlsx]

## Sheet: Table S8
Table S8. Patterns of mutations in the HQ CoV-2 dataset by gene partition.Totals does not necessarily much when analyzed regions and haplogroups; this is because a minor proportion of sequences could not be unequivocally classified into an haplogroup
	ORF1a		ORF1b		S		N		ORF3a		ORF7a		M		ORF8		ORF10		ORF6		E		Intergenic
	pos. 266-13483		pos. 13468-21555		pos. 21563-25384		pos. 28274-29533		pos. 25393-26220		pos. 27394-27759		pos. 26523-27191		pos. 27894-28259		pos. 29558-29674		pos. 27202-27387		pos. 26245-26472		length = 355 bp
	Number	Frequency	Number	Frequency	Number	Frequency	Number	Frequency	Number	Frequency	Number	Frequency	Number	Frequency	Number	Frequency	Number	Frequency	Number	Frequency	Number	Frequency	Number	Frequency
Number of variables in different sequences	860	0.07	489	0.06	311	0.08	171	0.14	97	0.12	44	0.12	40	0.06	30	0.08	24	0.21	19	0.1	17	0.07	69	0.2
Transitions	659	0.77	357	0.73	196	0.63	112	0.65	54	0.56	30	0.68	25	0.62	20	0.67	15	0.62	10	0.53	13	0.76	35	0.51
Purine transition (A<>G)	189	0.29	99	0.28	54	0.28	27	0.24	15	0.28	4	0.13	4	0.16	5	0.25	3	0.2	3	0.3	4	0.31	13	0.37
Pyrimidine transitions (C<>T)	470	0.71	258	0.72	142	0.72	85	0.76	39	0.72	26	0.87	21	0.84	15	0.75	12	0.8	7	0.7	9	0.69	22	0.63
Transversions	201	0.23	132	0.27	115	0.37	59	0.35	43	0.44	14	0.32	15	0.38	10	0.33	9	0.38	9	0.47	4	0.24	34	0.49
Pyrimidine to purine	70	0.35	27	0.2	22	0.19	13	0.22	9	0.21	2	0.14	0	0	3	0.3	3	0.33	0	0	2	0.5	2	0.06
T>A	26	0.37	8	0.3	4	0.18	2	0.15	1	0.11	0	0	0	-	0	0	2	0.67	0	-	1	0.5	0	0
T>G	18	0.26	10	0.37	8	0.36	3	0.23	2	0.22	0	0	0	-	1	0.33	0	0	0	-	1	0.5	0	0
C>A	19	0.27	8	0.3	6	0.27	6	0.46	5	0.56	0	0	0	-	1	0.33	1	0.33	0	-	0	0	2	1
C>G	7	0.1	1	0.04	4	0.18	2	0.15	1	0.11	2	1	0	-	1	0.33	0	0	0	-	0	0	0	0
Purine to pyrimidine	131	0.65	105	0.8	93	0.81	46	0.78	34	0.79	12	0.86	15	1	7	0.7	6	0.67	9	1	2	0.5	32	0.94
A>T	16	0.12	12	0.11	13	0.14	6	0.13	0	0	2	0.17	2	0.13	0	0	0	0	1	0.11	0	0	4	0.12
A>C	23	0.18	7	0.07	6	0.06	1	0.02	3	0.09	1	0.08	0	0	0	0	2	0.33	0	0	0	0	2	0.06
G>C	7	0.05	2	0.02	15	0.16	4	0.09	2	0.06	0	0	2	0.13	1	0.14	2	0.33	0	0	0	0	6	0.19
G>T	85	0.65	84	0.8	59	0.63	35	0.76	29	0.85	9	0.75	11	0.73	6	0.86	2	0.33	8	0.89	2	1	20	0.62
Ratio transitions:transversions	3.28	-	2.7	-	1.7	-	1.9	-	1.26	-	2.14	-	1.67	-	2	-	1.67	-	1.11	-	3.25	-	1.03	-
Synonymous	330	0.38	195	0.4	113	0.36	61	0.36	32	0.33	14	0.32	24	0.6	11	0.37	5	0.21	3	0.16	8	0.47	0	0
Non-synonymous	530	0.62	294	0.6	198	0.64	110	0.64	65	0.67	30	0.68	16	0.4	19	0.63	19	0.79	16	0.84	9	0.53	0	0
Missense	528	1	293	1	197	0.99	109	0.99	65	1	25	0.83	16	1	18	0.95	17	0.89	14	0.88	9	1	0	-
Missense in last codon	0	0	0	0	0	0	1	0.01	0	0	0	0	0	0	0	0	1	0.05	0	0	0	0	0	-
Start lost	2	0	1	0	1	0.01	0	0	0	0	5	0.17	0	0	1	0.05	0	0	2	0.12	0	0	0	-
Stop gain	0	0	0	0	0	0	0	0	0	0	0	0	0	0	0	0	1	0.05	0	0	0	0	0	-

## Sheet: Test - ts versus tv
Table S8. Fisher's exact test between transitions and transversions in the different CoV-2 genes/regions
	ORF1b	S	N	ORF3a	ORF7a	M	ORF8	ORF10	ORF6	E	Intergenic
ORF1a	0.1485	<0.0001	0.0028	<0.0001	0.2056	0.0562	0.2726	0.141	0.0257	1	<0.0001
ORF1b		0.0036	0.0776	0.001	0.4842	0.1974	0.5265	0.2513	0.0664	1	0.0004
S			0.6209	0.2325	0.616	1	0.8432	1	0.4648	0.3105	0.0759
N				0.1181	0.8587	0.7166	1	0.8206	0.3155	0.4303	0.0405
ORF3a					0.1961	0.5689	0.3971	0.6475	0.807	0.1804	0.6359
ORF7a						0.6494	1	0.7891	0.2662	0.7552	0.0806
M							0.8036	1	0.5737	0.3702	0.318
ORF8								0.7812	0.3774	0.5288	0.1876
ORF10									0.5496	0.4986	0.3513
ORF6										0.1771	1
E											0.0629

## Sheet: Test - syn versus non-syn
Table S8. Fisher's exact test between synonymous and non-synonymous variants observed in the different CoV-2 genes
	ORF1b	S	N	ORF3a	ORF7a	M	ORF8	ORF10	ORF6	E
ORF1a	0.6014	0.5399	0.5462	0.3219	0.429	0.0078	1	0.0905	0.0548	0.4627
ORF1b		0.3331	0.3623	0.2118	0.3358	0.0185	0.8483	0.0848	0.0522	0.6182
S			0.9212	0.6272	0.617	0.0055	1	0.1822	0.0841	0.4409
N				0.6904	0.724	0.0068	1	0.1735	0.1229	0.4305
ORF3a					1	0.0043	0.8257	0.3254	0.1763	0.2811
ORF7a						0.0153	0.803	0.4054	0.2304	0.3732
M							0.0902	0.0039	0.0019	0.3971
ORF8								0.2433	0.1941	0.5462
ORF10									1	0.0978
ORF6										0.0704
